# Supplementary material for: Excited State Frequencies of Chlorophyll f and Chlorophyll a and Evaluation of Displacement through Franck-Condon Progression Calculations
Source: PubMed Central journal article supplement (PMC6479460; doi:10.3390/molecules24071326), 2019-04-04
Supplement: molecules-24-01326-s001.pdf [file molecules-24-01326-s001.pdf]

## Supplementary Materials

### Excited state frequencies of chlorophyll f and chlorophyll a and evaluation of displacement through Franck-Condon progression calculations

**Noura Zamzam and Jasper J. van Thor \***

Department of Life Sciences, Molecular Biophysics, Imperial College  
London, London, UK; n.zamzam16@imperial.ac.uk

\*Correspondence: j.vanthor@imperial.ac.uk

Received: 16 February 2019; Accepted: 02 April 2019; Published: date

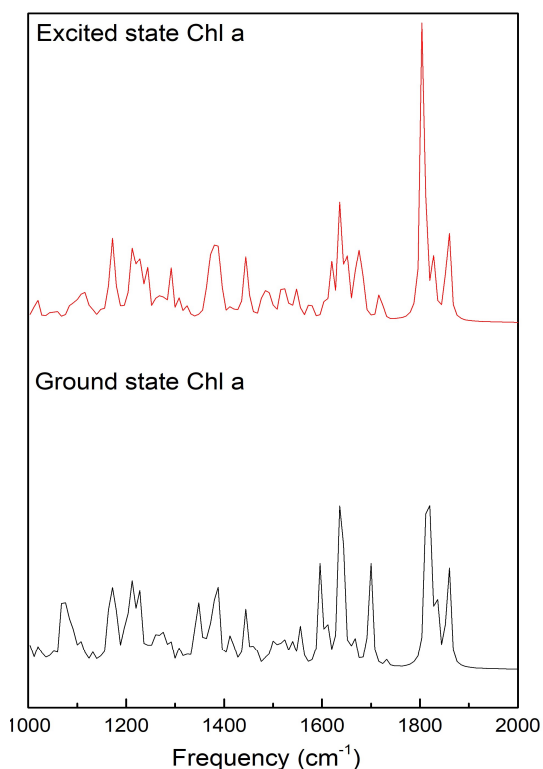

Figure S1. Calculated infrared spectra for ground and excited states of chlorophyll a using CAM-B3LYP functional. The mid-frequency 1000–2000  $\text{cm}^{-1}$  region is shown.

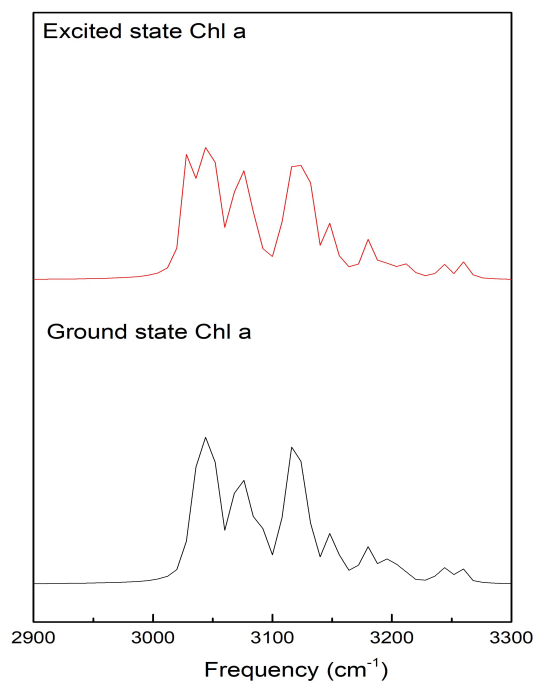

Figure S2. Calculated infrared spectra for ground and excited states of chlorophyll a using CAM-B3LYP functional. The high-frequency 2900-3300 cm<sup>-1</sup> region is shown.

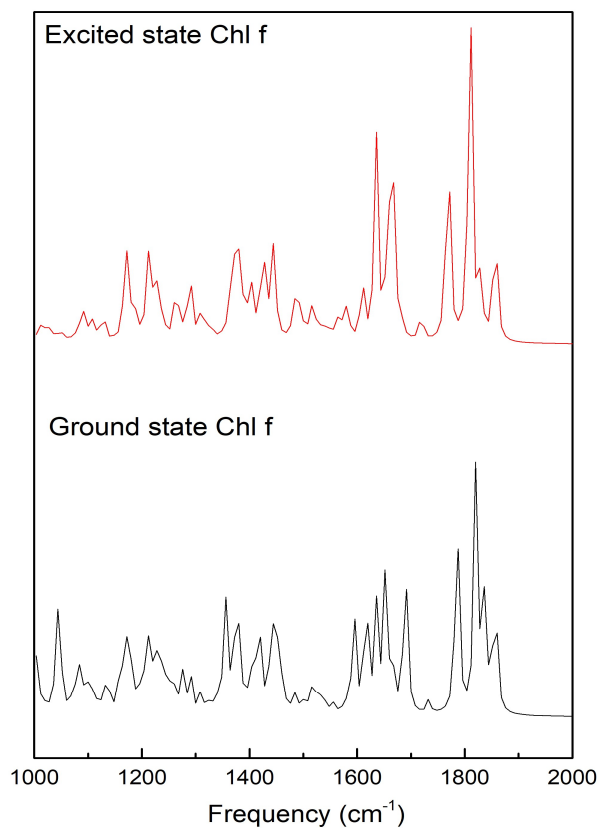

Figure S3. Calculated infrared spectra for ground and excited states of chlorophyll f using CAM-B3LYP functional. The mid-frequency 1000-2000 cm<sup>-1</sup> region is shown.

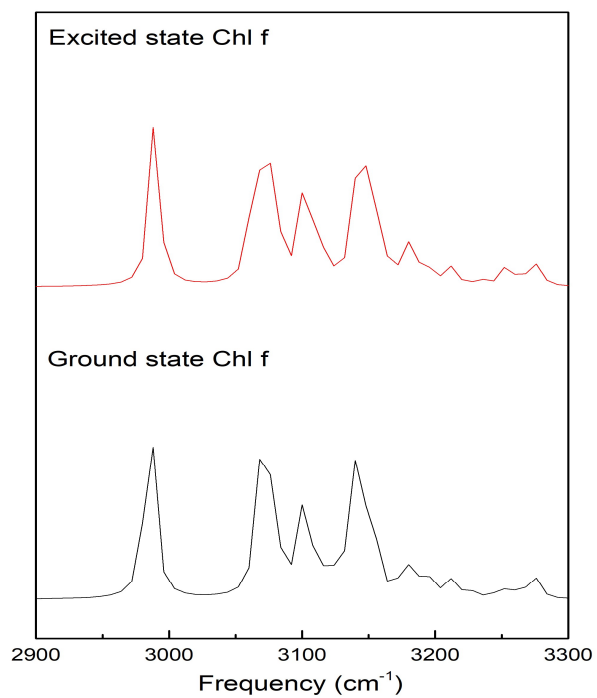

Figure S4. Calculated infrared spectra for ground and excited states of chlorophyll f using CAM-B3LYP functional. The high-frequency 2900-3300  $\text{cm}^{-1}$  region is shown.

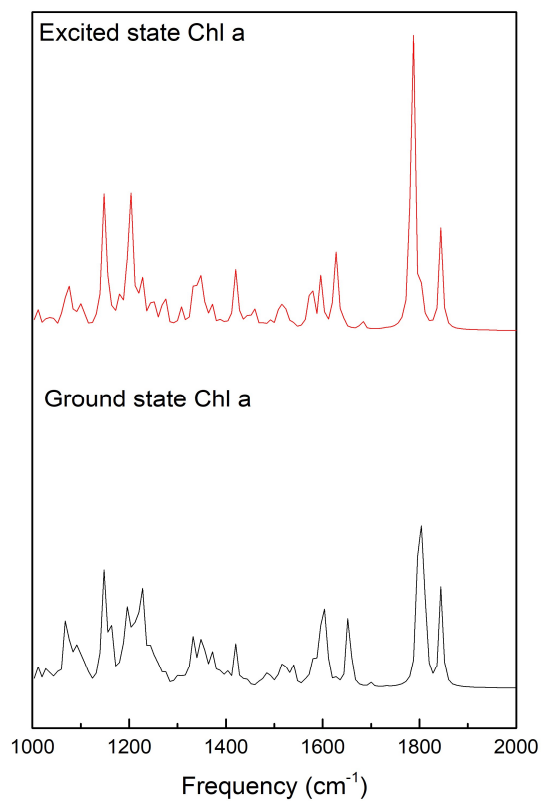

Figure S5. Calculated infrared spectra for ground and excited states of chlorophyll a using B3LYP functional. The mid-frequency 1000-2000 cm<sup>-1</sup> region is shown.

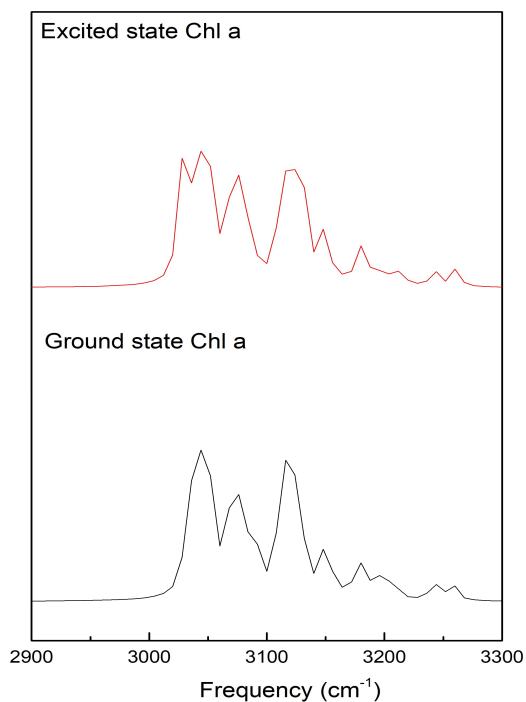

Figure S6. Calculated infrared spectra for ground and excited states of chlorophyll a using B3LYP functional. The high-frequency 2900-3300  $\text{cm}^{-1}$  region is shown.

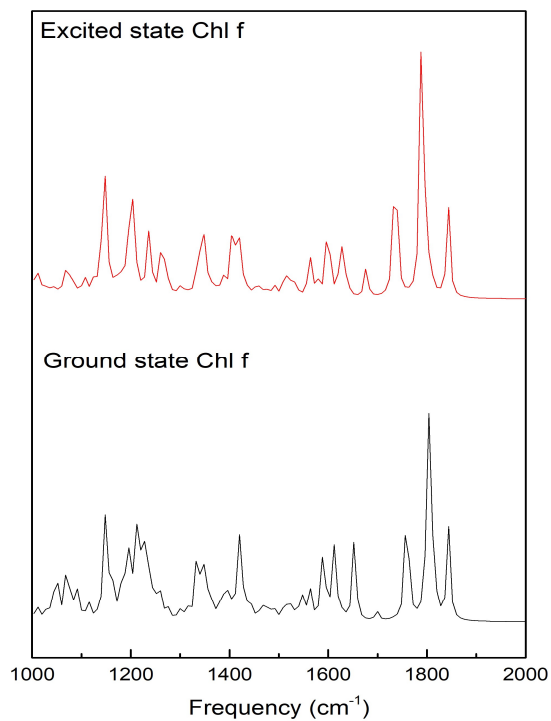

Figure S7. Calculated infrared spectra for ground and excited states of chlorophyll f using B3LYP functional. The mid-frequency 1000-2000  $\text{cm}^{-1}$  region is shown.

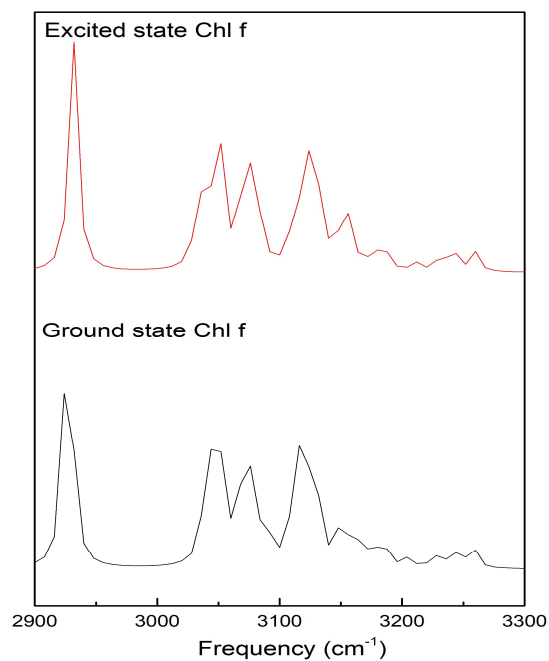

Figure S8. Calculated infrared spectra for ground and excited states of chlorophyll f using B3LYP functional. The high-frequency 2900-3300 cm<sup>-1</sup> region is shown.

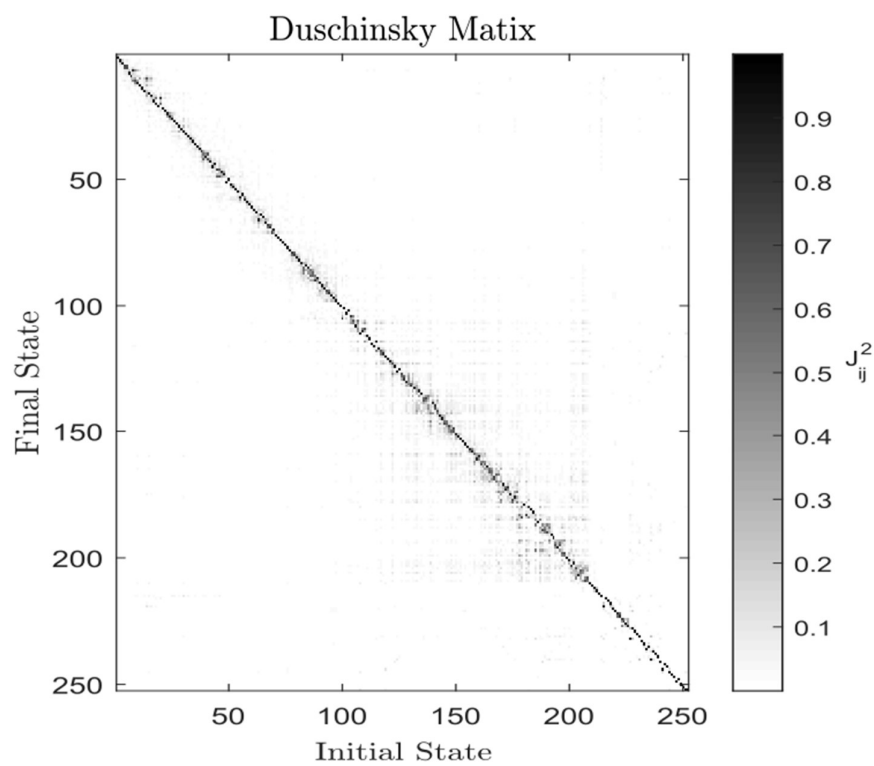

Figure S9. The Duschinsky matrix correlating the ground (initial) state and excited (final) state normal modes of chlorophyll a calculated using the CAM-B3LYP functional.



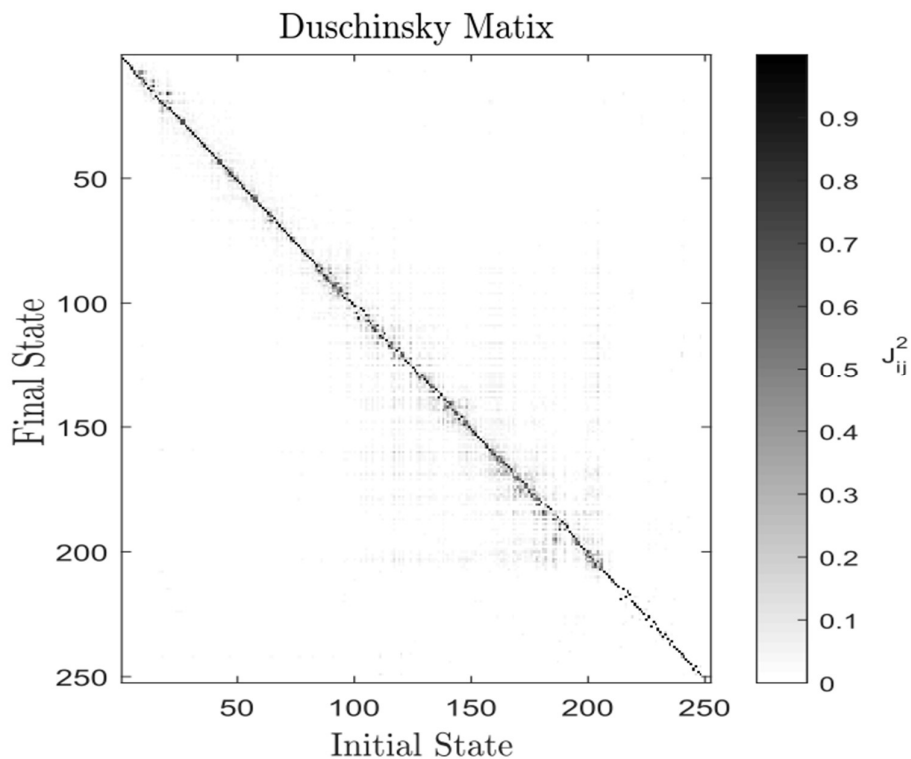

Figure S10. The Duschinsky matrix correlating the ground (initial) state and excited (final) state normal modes of chlorophyll f calculated using the CAM-B3LYP functional.

Table S1. Calculated frequencies ( $\text{cm}^{-1}$ ) of ground state chlorophyll a using CAM-B3LYP functional with 6-31G (d) basis set.

|          |          |          |          |          |          |
|----------|----------|----------|----------|----------|----------|
| 10.849   | 266.222  | 737.862  | 1079.824 | 1413.328 | 1753.376 |
| 13.737   | 282.1898 | 741.9342 | 1092.538 | 1421.439 | 1816.052 |
| 21.5337  | 284.8109 | 750.6164 | 1095.967 | 1439.611 | 1833.184 |
| 24.4199  | 294.4273 | 758.9692 | 1103.721 | 1443.27  | 1857.97  |
| 29.9762  | 304.1598 | 763.9984 | 1109.98  | 1444.203 | 3064.32  |
| 34.8833  | 307.4622 | 765.6368 | 1113.824 | 1446.401 | 3065.468 |
| 39.1518  | 312.4171 | 780.1567 | 1130.066 | 1447.424 | 3068.022 |
| 42.7801  | 324.8944 | 784.2532 | 1144.701 | 1451.564 | 3070.63  |
| 47.1424  | 326.6045 | 792.7317 | 1151.179 | 1455.968 | 3070.732 |
| 52.454   | 351.2187 | 796.2536 | 1163.201 | 1463.881 | 3071.132 |
| 55.5345  | 355.4323 | 801.1813 | 1169.48  | 1484.479 | 3076.943 |
| 60.5812  | 363.2308 | 809.8604 | 1173.102 | 1492.664 | 3078.397 |
| 65.474   | 379.5915 | 814.0878 | 1179.671 | 1497.218 | 3079.798 |
| 70.2177  | 396.6512 | 818.8595 | 1191.433 | 1498.065 | 3100.751 |
| 79.143   | 398.3808 | 853.0659 | 1192.544 | 1498.337 | 3101.056 |
| 88.5673  | 408.939  | 860.4342 | 1199.267 | 1504.958 | 3102.472 |
| 95.7613  | 416.8129 | 874.5577 | 1202.43  | 1510.596 | 3105.959 |
| 97.0719  | 421.6852 | 891.5648 | 1211.784 | 1513.312 | 3106.305 |
| 100.612  | 439.9578 | 905.8278 | 1214.685 | 1518.4   | 3114.376 |
| 115.5303 | 467.9709 | 928.8398 | 1223.313 | 1518.777 | 3115.46  |

|          |          |          |          |          |          |
|----------|----------|----------|----------|----------|----------|
| 118.339  | 473.1495 | 930.1869 | 1225.194 | 1519.557 | 3123.413 |
| 123.5258 | 482.5786 | 936.4732 | 1229.132 | 1519.96  | 3123.555 |
| 130.6919 | 494.1617 | 939.2747 | 1243.848 | 1520.441 | 3138.832 |
| 138.1383 | 503.3225 | 943.8531 | 1247.917 | 1521.929 | 3140.538 |
| 142.9572 | 513.1432 | 960.2733 | 1258.447 | 1522.489 | 3146.162 |
| 147.1301 | 539.1687 | 961.8967 | 1272.314 | 1523.793 | 3146.274 |
| 155.5913 | 543.2651 | 970.8006 | 1288.615 | 1525.082 | 3147.306 |
| 168.8848 | 558.9596 | 980.4914 | 1309.514 | 1525.248 | 3151.952 |
| 176.4104 | 564.6573 | 982.2719 | 1311.926 | 1527.865 | 3152.277 |
| 179.3842 | 582.6085 | 995.0534 | 1324.662 | 1529.856 | 3155.006 |
| 185.4021 | 587.4702 | 999.2081 | 1333.645 | 1532.424 | 3169.381 |
| 193.9857 | 599.5529 | 1004.786 | 1336.36  | 1535.32  | 3178.166 |
| 200.8566 | 622.4367 | 1019.665 | 1344.7   | 1542.016 | 3178.99  |
| 203.8958 | 646.5407 | 1029.965 | 1351.378 | 1557.006 | 3183.005 |
| 209.2582 | 660.6    | 1037.675 | 1354.288 | 1597.033 | 3197.042 |
| 218.3934 | 674.9298 | 1042.844 | 1367.8   | 1610.536 | 3201.404 |
| 223.5242 | 688.7546 | 1048.88  | 1370.842 | 1638.919 | 3211.42  |
| 231.1738 | 694.539  | 1052.399 | 1380.982 | 1640.69  | 3221.33  |
| 243.7971 | 708.9457 | 1069.258 | 1387.188 | 1663.944 | 3222.768 |
| 245.6519 | 713.3982 | 1074.472 | 1391.723 | 1666.438 | 3230.939 |
| 248.5335 | 727.7275 | 1075.965 | 1406.462 | 1698.786 | 3265.3   |
| 255.1628 | 731.5416 | 1076.801 | 1412.795 | 1732.521 | 3276.427 |

Table S2. Calculated frequencies ( $\text{cm}^{-1}$ ) of excited state chlorophyll a using CAM-B3LYP functional with 6-31G (d) basis set.

|         |          |          |          |          |          |
|---------|----------|----------|----------|----------|----------|
| 10.9498 | 262.805  | 730.942  | 1082.432 | 1413.04  | 1753.248 |
| 13.8646 | 278.3209 | 736.7048 | 1093.605 | 1419.438 | 1806.179 |
| 20.2346 | 279.5685 | 737.9612 | 1098.683 | 1426.901 | 1828.178 |
| 24.1432 | 291.6869 | 743.0667 | 1102.931 | 1441.364 | 1857.415 |
| 32.7376 | 301.2425 | 755.2092 | 1110.716 | 1442.658 | 3056.985 |
| 33.7717 | 303.0009 | 764.8125 | 1113.213 | 1442.907 | 3059.713 |
| 40.4819 | 307.812  | 774.5284 | 1121.57  | 1446.227 | 3066.605 |
| 47.403  | 323.3732 | 780.1827 | 1133.705 | 1448.561 | 3068.113 |
| 47.9681 | 323.8072 | 789.1016 | 1147.789 | 1449.854 | 3069.588 |
| 57.5037 | 347.9688 | 793.1855 | 1150.767 | 1460.107 | 3072.232 |
| 57.9845 | 352.2847 | 796.3017 | 1166.906 | 1476.085 | 3074.291 |

|          |          |          |          |          |          |
|----------|----------|----------|----------|----------|----------|
| 62.6466  | 360.4847 | 806.5936 | 1169.859 | 1480.406 | 3077.748 |
| 69.4101  | 377.6971 | 811.6256 | 1171.634 | 1484.15  | 3081.026 |
| 76.6213  | 386.6321 | 820.1961 | 1177.849 | 1488.19  | 3099.625 |
| 86.8164  | 391.0995 | 849.1516 | 1182.369 | 1493.185 | 3100.664 |
| 89.6021  | 402.8078 | 860.2408 | 1191.412 | 1497.279 | 3101.335 |
| 96.1371  | 417.2271 | 864.5873 | 1195.123 | 1497.921 | 3102.691 |
| 98.5552  | 420.7061 | 870.768  | 1208.1   | 1511.522 | 3107.67  |
| 111.4654 | 433.5189 | 876.466  | 1213.591 | 1513.652 | 3107.718 |
| 117.296  | 461.7842 | 892.1248 | 1219.912 | 1514.467 | 3114.295 |
| 120.3385 | 470.9264 | 923.971  | 1222.84  | 1515.233 | 3117.22  |
| 123.4601 | 479.3462 | 933.0547 | 1229.67  | 1515.582 | 3117.883 |
| 130.0527 | 480.2699 | 943.1266 | 1238.757 | 1517.437 | 3138.064 |
| 138.1627 | 489.0461 | 946.5488 | 1243.409 | 1519.112 | 3141.871 |
| 143.3749 | 506.1815 | 952.6542 | 1263.91  | 1519.654 | 3145.523 |
| 148.1583 | 535.4069 | 958.3469 | 1274.078 | 1521.853 | 3147.2   |
| 155.6138 | 538.6673 | 965.4533 | 1290.406 | 1524.814 | 3147.511 |
| 167.7606 | 549.5987 | 976.0416 | 1307.652 | 1525.011 | 3147.707 |
| 173.7786 | 559.9644 | 982.0524 | 1309.663 | 1525.641 | 3152.481 |
| 179.3063 | 581.4309 | 998.3809 | 1322.253 | 1527.528 | 3156.756 |
| 186.2263 | 584.9278 | 1002.144 | 1328.055 | 1528.894 | 3167.994 |
| 192.2762 | 593.6842 | 1012.435 | 1334.915 | 1533.018 | 3177.196 |
| 197.7318 | 617.7969 | 1020.737 | 1346.741 | 1540.186 | 3177.354 |
| 202.5731 | 644.8646 | 1033.652 | 1352.272 | 1550.064 | 3178.775 |
| 207.7165 | 656.3931 | 1037.761 | 1353.935 | 1575.938 | 3198.956 |
| 215.5933 | 675.5332 | 1040.006 | 1366.265 | 1604.539 | 3200.494 |
| 222.1813 | 681.5176 | 1047.991 | 1371.336 | 1618.555 | 3211.364 |
| 229.706  | 690.6185 | 1050.28  | 1377.625 | 1637.367 | 3222.508 |

|          |          |          |          |          |          |
|----------|----------|----------|----------|----------|----------|
| 238.0096 | 703.1067 | 1061.291 | 1381.024 | 1649.969 | 3233.719 |
| 247.0198 | 709.079  | 1070.161 | 1388.303 | 1672.734 | 3238.034 |
| 247.8187 | 720.2227 | 1072.414 | 1391.797 | 1683.438 | 3264.666 |
| 250.4933 | 729.6551 | 1072.948 | 1412.33  | 1718.966 | 3278.89  |

Table S3. Calculated frequencies ( $\text{cm}^{-1}$ ) of ground state chlorophyll f using CAM-B3LYP functional with 6-31G (d) basis set.

|          |          |          |           |           |           |
|----------|----------|----------|-----------|-----------|-----------|
| 11.3551  | 265.8789 | 748.9306 | 1097.9957 | 1444.355  | 3069.6225 |
| 14.0231  | 282.4707 | 755.3953 | 1103.892  | 1445.1694 | 3070.645  |
| 21.1784  | 288.6985 | 757.6155 | 1111.4515 | 1447.6403 | 3071.4103 |
| 24.2792  | 297.7394 | 766.1104 | 1129.1464 | 1449.7969 | 3072.1617 |
| 31.0756  | 306.215  | 772.8332 | 1136.5603 | 1452.5359 | 3076.4477 |
| 34.7443  | 314.4053 | 784.2401 | 1150.5707 | 1461.7254 | 3078.1184 |
| 38.8239  | 322.5535 | 786.9274 | 1159.8603 | 1481.9113 | 3086.5219 |
| 40.5105  | 330.9975 | 795.141  | 1170.1946 | 1484.3323 | 3099.9544 |
| 43.1237  | 347.3739 | 801.8885 | 1174.7948 | 1488.8463 | 3101.7806 |
| 49.6011  | 354.1088 | 805.6643 | 1181.2604 | 1497.2171 | 3102.6288 |
| 59.6627  | 358.3571 | 810.782  | 1191.4991 | 1497.9959 | 3105.727  |
| 62.9092  | 379.4467 | 815.4549 | 1192.0581 | 1503.669  | 3106.021  |
| 67.2028  | 383.1667 | 843.1363 | 1199.7676 | 1513.0003 | 3113.7206 |
| 70.261   | 397.7913 | 863.076  | 1208.2053 | 1513.8128 | 3118.6062 |
| 77.1071  | 403.8061 | 875.1599 | 1213.8228 | 1514.3686 | 3125.1287 |
| 85.0635  | 406.7953 | 892.0528 | 1215.4458 | 1518.0399 | 3137.2057 |
| 90.0915  | 418.9776 | 913.4858 | 1226.552  | 1518.6444 | 3140.4102 |
| 95.9012  | 420.8914 | 919.9477 | 1227.9941 | 1519.1861 | 3144.9382 |
| 110.0846 | 447.9595 | 929.3218 | 1232.969  | 1519.884  | 3146.5118 |
| 114.3343 | 457.0593 | 935.6853 | 1244.4382 | 1521.8079 | 3148.0864 |
| 117.5494 | 480.3961 | 939.1346 | 1248.7015 | 1524.8515 | 3153.5791 |
| 122.4675 | 488.6951 | 943.2392 | 1262.029  | 1525.6978 | 3154.5685 |
| 127.2332 | 500.6656 | 956.0291 | 1275.9408 | 1527.583  | 3172.474  |
| 135.4128 | 508.1606 | 960.8984 | 1290.2581 | 1529.3768 | 3177.5422 |
| 141.3766 | 523.3371 | 968.596  | 1309.9361 | 1529.8812 | 3180.4696 |
| 142.5886 | 540.6668 | 981.924  | 1314.9428 | 1532.8696 | 3186.6974 |
| 149.9181 | 554.3174 | 984.5611 | 1325.1351 | 1542.2649 | 3196.0115 |
| 153.9548 | 560.7207 | 986.735  | 1333.9566 | 1556.304  | 3200.0156 |
| 168.6775 | 577.7633 | 998.4019 | 1337.5381 | 1577.3368 | 3212.8584 |
| 175.2397 | 582.3582 | 999.077  | 1347.4683 | 1594.1363 | 3225.2885 |
| 180.7544 | 594.1982 | 1004.234 | 1354.6515 | 1616.8216 | 3241.6456 |

|          |          |           |           |           |           |
|----------|----------|-----------|-----------|-----------|-----------|
| 189.6318 | 600.8665 | 1015.7859 | 1356.6613 | 1636.4244 | 3249.8611 |
| 193.3928 | 629.58   | 1030.3814 | 1369.0377 | 1652.8118 | 3264.3759 |
| 202.8683 | 646.196  | 1036.0432 | 1373.3763 | 1665.2272 | 3276.2481 |
| 205.5816 | 655.787  | 1036.9415 | 1380.7283 | 1689.6321 |           |
| 212.9346 | 682.9765 | 1045.344  | 1391.7724 | 1732.8946 |           |
| 218.5636 | 690.6125 | 1048.2548 | 1402.1173 | 1753.1379 |           |
| 226.3134 | 699.6658 | 1052.479  | 1412.617  | 1785.6827 |           |
| 232.0044 | 708.8569 | 1068.913  | 1414.3437 | 1821.0619 |           |
| 241.0891 | 717.2089 | 1074.6741 | 1419.748  | 1837.3186 |           |
| 247.5464 | 726.4587 | 1075.1862 | 1432.5909 | 1856.5734 |           |
| 250.6696 | 737.3318 | 1081.274  | 1439.2607 | 2985.4174 |           |
| 263.9159 | 744.2552 | 1094.0427 | 1440.6723 | 3067.1413 |           |

---

Table S4. Calculated frequencies ( $\text{cm}^{-1}$ ) of excited state chlorophyll f using CAM-B3LYP functional with 6-31G (d) basis set.

|          |          |          |          |          |          |
|----------|----------|----------|----------|----------|----------|
| 10.6451  | 256.2605 | 733.6213 | 1072.959 | 1418.01  | 1810.094 |
| 14.0796  | 263.5383 | 739.6944 | 1081.509 | 1420.016 | 1829.348 |
| 20.7878  | 279.765  | 741.3512 | 1091.638 | 1426.245 | 1856.55  |
| 24.1769  | 288.865  | 751.253  | 1094.408 | 1440.691 | 2989.135 |
| 33.1072  | 295.5596 | 755.4515 | 1101.992 | 1442.118 | 3061.412 |
| 34.3669  | 305.7311 | 759.0388 | 1109.976 | 1443.174 | 3066.852 |
| 39.1987  | 306.3387 | 765.8369 | 1118.661 | 1443.687 | 3071.021 |
| 42.5249  | 320.0223 | 782.7617 | 1128.497 | 1446.873 | 3071.426 |
| 47.6451  | 324.5182 | 783.8972 | 1145.062 | 1450.051 | 3073.196 |
| 52.5666  | 344.1878 | 793.5421 | 1149.899 | 1460.108 | 3076.452 |
| 61.6269  | 352.1567 | 796.5472 | 1167.77  | 1473.402 | 3080.144 |
| 62.3813  | 356.4044 | 805.8775 | 1170.355 | 1482.074 | 3083.386 |
| 70.1912  | 376.1601 | 814.2811 | 1175.519 | 1484.349 | 3100.499 |
| 75.4921  | 381.8445 | 818.8853 | 1181.719 | 1487.048 | 3101.525 |
| 84.5372  | 387.5846 | 844.4598 | 1188.516 | 1492.454 | 3102.659 |
| 89.5754  | 394.4286 | 862.1955 | 1191.97  | 1497.465 | 3105.066 |
| 95.2117  | 405.7625 | 871.6223 | 1200.497 | 1498.06  | 3109.55  |
| 107.8309 | 417.8308 | 873.301  | 1210.08  | 1510.56  | 3110.136 |
| 114.538  | 420.4814 | 886.2821 | 1214.016 | 1513.49  | 3114.282 |
| 117.7117 | 440.1227 | 899.2032 | 1221.869 | 1513.812 | 3117.542 |
| 121.8486 | 455.399  | 903.2817 | 1223.155 | 1515.267 | 3139.845 |
| 122.8315 | 477.267  | 923.1503 | 1230.475 | 1515.576 | 3143.414 |
| 128.3699 | 482.0339 | 934.6981 | 1234.616 | 1517.149 | 3146.741 |
| 134.6757 | 485.5301 | 943.4736 | 1245.264 | 1519.029 | 3147.813 |
| 139.6474 | 496.2004 | 950.028  | 1263.748 | 1521.658 | 3149.439 |
| 142.2178 | 515.1771 | 962.6937 | 1281.751 | 1525.462 | 3157.299 |
| 151.7348 | 538.831  | 966.904  | 1292.384 | 1525.787 | 3157.86  |
| 154.8265 | 544.9626 | 972.7583 | 1309.416 | 1528.262 | 3169.114 |
| 167.9592 | 560.1248 | 980.2215 | 1314.809 | 1528.684 | 3177.562 |
| 173.3504 | 576.1913 | 982.3038 | 1322.97  | 1532.92  | 3180.159 |
| 178.4508 | 582.2755 | 998.3704 | 1331.902 | 1540.47  | 3184.018 |
| 187.7389 | 588.2023 | 1003.063 | 1335.305 | 1551.372 | 3195.727 |
| 191.9617 | 595.8818 | 1013.221 | 1350.207 | 1567.391 | 3200.191 |
| 200.343  | 627.4004 | 1015.547 | 1352.728 | 1582.012 | 3212.825 |
| 204.6974 | 646.5526 | 1023.418 | 1354.577 | 1609.579 | 3234.017 |
| 210.7923 | 653.8816 | 1024.868 | 1366.477 | 1635.441 | 3252.283 |
| 215.935  | 680.8616 | 1035.548 | 1371.397 | 1657.803 | 3256.397 |

|          |          |          |          |          |          |
|----------|----------|----------|----------|----------|----------|
| 224.4967 | 685.5404 | 1040.933 | 1379.979 | 1668.796 | 3264.541 |
| 231.7442 | 697.3553 | 1048.218 | 1382.935 | 1684.46  | 3276.995 |
| 238.5202 | 704.1353 | 1051.821 | 1391.166 | 1719.4   |          |
| 243.3594 | 710.7256 | 1063.826 | 1402.211 | 1753.123 |          |
| 250.9561 | 722.2969 | 1070.558 | 1412.626 | 1769.048 |          |

Table S5. Calculated frequencies ( $\text{cm}^{-1}$ ) of ground state chlorophyll a using B3LYP functional with 6-31G (d) basis set.

|          |          |          |          |          |          |
|----------|----------|----------|----------|----------|----------|
| 10.75    | 265.2909 | 726.4054 | 1068.446 | 1401.271 | 1730.332 |
| 11.2252  | 278.2743 | 732.5541 | 1068.674 | 1402.643 | 1800.324 |
| 20.7687  | 279.3731 | 735.2677 | 1078.31  | 1420.069 | 1811.841 |
| 24.5037  | 293.4905 | 741.959  | 1087.767 | 1423.38  | 1844.751 |
| 34.2307  | 299.5104 | 751.1639 | 1092.344 | 1435.186 | 3032.674 |
| 41.4108  | 304.654  | 757.0911 | 1103.156 | 1437.486 | 3037.217 |
| 42.1614  | 306.8022 | 764.1563 | 1112.925 | 1437.987 | 3037.596 |
| 48.1679  | 321.1632 | 773.1982 | 1134.38  | 1439.832 | 3040.646 |
| 49.7486  | 322.9572 | 780.2767 | 1142.149 | 1442.925 | 3045.947 |
| 56.6052  | 346.2357 | 782.612  | 1147.346 | 1445.556 | 3047.176 |
| 59.4481  | 350.6508 | 788.8274 | 1156.096 | 1468.758 | 3048.333 |
| 60.714   | 357.1853 | 799.5865 | 1159.718 | 1474.235 | 3050.177 |
| 66.8592  | 376.0625 | 803.6785 | 1164.426 | 1478.322 | 3062.499 |
| 71.2066  | 389.375  | 809.8816 | 1178.151 | 1482.683 | 3065.522 |
| 78.3044  | 392.3331 | 843.6095 | 1181.05  | 1487.094 | 3066.855 |
| 90.8991  | 400.3352 | 845.7435 | 1185.397 | 1491.34  | 3073.686 |
| 96.2742  | 411.5948 | 856.8979 | 1190.176 | 1495.204 | 3075.061 |
| 96.5397  | 415.1241 | 874.3435 | 1196.23  | 1496.148 | 3077.199 |
| 104.6843 | 432.7483 | 879.4456 | 1197.259 | 1510.835 | 3080.253 |
| 115.2636 | 460.5783 | 886.8293 | 1207.582 | 1513.303 | 3084.656 |
| 119.3657 | 467.578  | 913.4371 | 1213.215 | 1515.389 | 3087.995 |
| 123.5698 | 475.8333 | 916.6562 | 1220.517 | 1516.007 | 3091.634 |
| 129.3096 | 487.7942 | 931.2095 | 1228.776 | 1516.4   | 3108.723 |
| 132.2451 | 493.6997 | 933.0148 | 1233.26  | 1517.003 | 3115.468 |
| 139.4841 | 505.139  | 936.7251 | 1244.386 | 1517.034 | 3117.29  |
| 146.3005 | 532.9971 | 942.8718 | 1255.672 | 1521.952 | 3119.06  |
| 154.162  | 533.2995 | 945.4902 | 1272.509 | 1523.141 | 3123.735 |
| 167.0263 | 549.4314 | 958.3199 | 1297.767 | 1524.172 | 3125.19  |
| 174.7787 | 553.4745 | 965.5062 | 1305.898 | 1526.131 | 3127.709 |
| 178.6579 | 574.5121 | 988.4841 | 1311.936 | 1526.63  | 3127.8   |
| 186.1298 | 580.0112 | 990.0287 | 1320.99  | 1528.017 | 3145.673 |
| 188.1012 | 585.0303 | 992.043  | 1329.348 | 1528.626 | 3147.737 |
| 197.2169 | 615.1055 | 1011.986 | 1330.147 | 1538.452 | 3151.949 |
| 202.6146 | 634.9786 | 1026.005 | 1341.853 | 1541.901 | 3157.723 |
| 205.4852 | 651.3553 | 1028.619 | 1346.977 | 1568.512 | 3175.448 |
| 213.1737 | 667.9582 | 1031.859 | 1347.281 | 1583.424 | 3177.697 |
| 223.1641 | 674.0627 | 1034.189 | 1351.739 | 1598.746 | 3183.358 |
| 231.2493 | 683.8062 | 1040.051 | 1361.592 | 1602.477 | 3196.672 |

|          |          |          |          |          |          |
|----------|----------|----------|----------|----------|----------|
| 241.258  | 696.168  | 1051.917 | 1373.282 | 1609.28  | 3201.633 |
| 244.0792 | 703.0604 | 1066.878 | 1378.602 | 1629.303 | 3208.725 |
| 247.8784 | 715.873  | 1067.514 | 1388.116 | 1654.283 | 3241.756 |
| 252.7377 | 720.9933 | 1068.319 | 1390.616 | 1700.415 | 3257.544 |

Table S6. Calculated frequencies ( $\text{cm}^{-1}$ ) of excited state chlorophyll a using B3LYP functional with 6-31G (d) basis set.

|          |          |          |          |          |          |
|----------|----------|----------|----------|----------|----------|
| 10.7602  | 261.8641 | 717.5331 | 1066.288 | 1386.711 | 1730.197 |
| 11.659   | 271.5634 | 724.3005 | 1067.9   | 1398.757 | 1785.772 |
| 20.7234  | 276.6938 | 725.9355 | 1075.633 | 1401.963 | 1804.928 |
| 24.3337  | 286.4552 | 731.3397 | 1078.633 | 1418.798 | 1844.21  |
| 34.0678  | 295.9137 | 742.64   | 1087.671 | 1423.369 | 3027.087 |
| 42.6836  | 301.3887 | 752.0364 | 1095.179 | 1434.619 | 3029.428 |
| 43.2155  | 305.0981 | 756.5658 | 1098.389 | 1436.033 | 3036.765 |
| 47.9279  | 318.3835 | 765.7633 | 1106.881 | 1436.456 | 3036.976 |
| 51.6617  | 321.4842 | 776.2877 | 1132.237 | 1441.564 | 3043.375 |
| 59.1931  | 343.601  | 777.3691 | 1133.627 | 1443.72  | 3045.762 |
| 61.435   | 347.6679 | 786.6949 | 1145     | 1445.174 | 3048.416 |
| 64.3318  | 355.8395 | 795.4906 | 1146.851 | 1451.302 | 3051.114 |
| 72.1561  | 373.3218 | 800.2848 | 1149.904 | 1460.656 | 3062.708 |
| 77.5545  | 379.7403 | 808.2336 | 1154.967 | 1473.427 | 3064.626 |
| 83.9433  | 383.647  | 829.3095 | 1166.965 | 1478.685 | 3067.046 |
| 91.275   | 395.8375 | 838.6249 | 1176.041 | 1485.49  | 3072.875 |
| 95.5947  | 410.8077 | 841.7152 | 1182.178 | 1491.526 | 3073.392 |
| 97.2561  | 415.6543 | 843.0785 | 1184.802 | 1495.127 | 3076.31  |
| 111.035  | 425.4949 | 851.614  | 1196.229 | 1495.842 | 3078.443 |
| 121.3568 | 454.1778 | 877.9749 | 1199.856 | 1508.213 | 3081.557 |
| 122.9871 | 463.6895 | 905.4192 | 1204.397 | 1512.163 | 3082.937 |
| 123.6632 | 471.9574 | 911.7861 | 1212.762 | 1512.424 | 3087.568 |
| 128.6014 | 473.3499 | 912.3807 | 1220.404 | 1513.061 | 3108.894 |
| 131.5825 | 482.2358 | 927.9818 | 1226.901 | 1513.988 | 3116.975 |
| 138.633  | 496.6277 | 933.3644 | 1242.347 | 1516.368 | 3119.143 |
| 145.1648 | 526.7973 | 938.1909 | 1252.986 | 1517.034 | 3120.158 |
| 153.3472 | 529.4973 | 944.4231 | 1269.039 | 1522.553 | 3120.488 |
| 165.577  | 537.743  | 959.0006 | 1275.181 | 1522.862 | 3126.395 |
| 170.7407 | 551.0973 | 961.9917 | 1296.079 | 1523.744 | 3130.372 |
| 178.1012 | 574.7096 | 985.7357 | 1307.714 | 1525.711 | 3130.864 |
| 185.8073 | 576.4033 | 989.7283 | 1309.07  | 1526.235 | 3144.442 |
| 190.3726 | 578.7644 | 992.0477 | 1319.884 | 1527.39  | 3147.38  |
| 197.2684 | 608.2724 | 1009.903 | 1328.848 | 1529.23  | 3147.692 |
| 201.2104 | 630.6347 | 1023.168 | 1333.984 | 1539.202 | 3158.119 |
| 204.2641 | 645.1427 | 1025.084 | 1338.653 | 1539.941 | 3175.837 |
| 210.3243 | 664.565  | 1027.904 | 1343.195 | 1561.757 | 3179.569 |
| 222.5162 | 666.2892 | 1029.127 | 1348.38  | 1571.383 | 3183.595 |
| 228.2014 | 682.456  | 1038.412 | 1350.52  | 1577.555 | 3199.258 |



|          |          |          |          |          |          |
|----------|----------|----------|----------|----------|----------|
| 235.6452 | 689.8434 | 1040.689 | 1360.207 | 1597.196 | 3210.707 |
| 243.2033 | 698.194  | 1062.557 | 1370.24  | 1626.407 | 3215.084 |
| 247.0451 | 708.0714 | 1063.728 | 1374.815 | 1639.7   | 3242.417 |
| 247.8962 | 715.8251 | 1065.741 | 1384.782 | 1681.869 | 3260.793 |

Table S7. Calculated frequencies ( $\text{cm}^{-1}$ ) of ground state chlorophyll f using B3LYP functional with 6-31G (d) basis set.

|          |          |          |          |          |          |
|----------|----------|----------|----------|----------|----------|
| 10.4591  | 262.3759 | 726.7941 | 1068.04  | 1402.655 | 1802.544 |
| 14.872   | 263.6149 | 734.8067 | 1068.632 | 1414.494 | 1813.679 |
| 20.8463  | 278.0363 | 736.8524 | 1068.91  | 1419.19  | 1843.731 |
| 24.5097  | 287.021  | 743.5688 | 1078.626 | 1421.964 | 2927.211 |
| 34.6378  | 292.2455 | 749.6178 | 1089.104 | 1427.845 | 3039.308 |
| 39.534   | 304.4148 | 755.0199 | 1092.953 | 1434.302 | 3040.544 |
| 41.0606  | 310.9425 | 759.2409 | 1114.038 | 1437.36  | 3041.944 |
| 43.0419  | 319.149  | 771.4307 | 1135.268 | 1437.99  | 3046.162 |
| 49.283   | 326.0078 | 776.739  | 1137.266 | 1442.109 | 3048.427 |
| 54.9475  | 343.2559 | 783.2142 | 1148.275 | 1447.036 | 3050.69  |
| 59.3939  | 350.3829 | 786.5754 | 1155.624 | 1462.429 | 3054.856 |
| 63.6328  | 353.6995 | 798.5174 | 1161.713 | 1467.802 | 3062.293 |
| 68.8011  | 373.864  | 804.2461 | 1177.319 | 1476.139 | 3067.473 |
| 70.9448  | 378.4298 | 808.0676 | 1178.538 | 1478.441 | 3068.03  |
| 77.2025  | 391.8527 | 833.3289 | 1182.762 | 1486.982 | 3074.663 |
| 87.9743  | 397.243  | 845.7578 | 1185.547 | 1491.503 | 3074.997 |
| 95.4884  | 401.1977 | 857.6897 | 1191.1   | 1494.867 | 3078.521 |
| 104.5617 | 412.728  | 883.1526 | 1196.831 | 1495.25  | 3080.029 |
| 114.1464 | 414.9086 | 886.0092 | 1197.504 | 1509.272 | 3087.187 |
| 118.7878 | 439.0238 | 902.6189 | 1209.916 | 1513.479 | 3089.817 |
| 120.9649 | 453.6281 | 913.8517 | 1212.193 | 1515.166 | 3110.089 |
| 123.0354 | 473.1728 | 917.116  | 1220.013 | 1515.335 | 3115.975 |
| 127.4572 | 480.6497 | 919.116  | 1231.32  | 1516.36  | 3117.712 |
| 132.3791 | 494.3623 | 933.295  | 1231.776 | 1516.775 | 3120     |
| 135.6637 | 495.7926 | 942.2825 | 1247.801 | 1523.09  | 3125.093 |
| 141.5309 | 516.9247 | 943.3225 | 1261.291 | 1524.011 | 3130.029 |
| 148.2326 | 532.191  | 951.0137 | 1276.081 | 1526.156 | 3131.083 |
| 157.2183 | 544.6504 | 954.0021 | 1298.525 | 1526.367 | 3147.605 |
| 167.8946 | 552.5605 | 958.6542 | 1308.878 | 1527.683 | 3149.485 |
| 173.9284 | 570.7764 | 973.2881 | 1314.571 | 1528.001 | 3157.767 |
| 179.7438 | 575.1739 | 988.8084 | 1321.172 | 1537.33  | 3160.832 |
| 187.1529 | 585.1635 | 989.561  | 1329.189 | 1541.402 | 3175.01  |
| 190.752  | 587.3458 | 993.3135 | 1333.931 | 1549.841 | 3175.914 |
| 200.3268 | 622.8327 | 1012.801 | 1341.425 | 1563.884 | 3185.016 |
| 202.9293 | 639.9768 | 1017.064 | 1343.009 | 1588.298 | 3205.206 |
| 210.5623 | 644.7205 | 1027.733 | 1348.02  | 1598.509 | 3224.028 |
| 212.3942 | 674.5273 | 1028.379 | 1351.231 | 1613.48  | 3228.227 |
| 229.56   | 676.6134 | 1032.219 | 1362.385 | 1629.979 | 3241.628 |

|          |          |          |          |          |          |
|----------|----------|----------|----------|----------|----------|
| 230.2841 | 689.3317 | 1039.529 | 1376.091 | 1653.057 | 3257.422 |
| 239.7744 | 698.5601 | 1048.351 | 1383.587 | 1698.601 |          |
| 244.2846 | 705.9693 | 1050.629 | 1390.53  | 1730.257 |          |
| 245.4764 | 716.1972 | 1066.78  | 1398.963 | 1759.315 |          |

Table S8. Calculated frequencies ( $\text{cm}^{-1}$ ) of excited state chlorophyll f using B3LYP functional with 6-31G (d) basis set.

|          |          |          |          |          |          |
|----------|----------|----------|----------|----------|----------|
| 10.2963  | 256.4439 | 720.5583 | 1064.677 | 1390.226 | 1790.343 |
| 14.8506  | 262.1067 | 727.0363 | 1065.592 | 1401.877 | 1806.868 |
| 21.0533  | 272.2852 | 729.7905 | 1068.125 | 1407.212 | 1843.282 |
| 24.338   | 285.4985 | 739.3153 | 1073.779 | 1417.748 | 2931.506 |
| 34.5328  | 289.0486 | 741.1066 | 1079.135 | 1420.098 | 3032.922 |
| 39.493   | 304.1183 | 746.3481 | 1088.123 | 1428.589 | 3037.498 |
| 41.824   | 308.8558 | 752.8279 | 1098.471 | 1435.625 | 3040.154 |
| 43.132   | 317.3182 | 765.0566 | 1109.639 | 1436.779 | 3045.349 |
| 51.0771  | 320.4958 | 772.3414 | 1125.099 | 1438.32  | 3050.824 |
| 55.8931  | 341.3302 | 777.4681 | 1134.196 | 1443.674 | 3051.348 |
| 62.1183  | 348.3064 | 785.9144 | 1141.302 | 1446.798 | 3051.827 |
| 66.1299  | 352.5445 | 794.6005 | 1148.644 | 1453.275 | 3063.514 |
| 71.6067  | 370.2035 | 802.4907 | 1151.548 | 1456.904 | 3066.42  |
| 76.4133  | 377.0179 | 807.4981 | 1165.745 | 1470.71  | 3068.391 |
| 79.7064  | 381.3502 | 823.9891 | 1171.42  | 1478.367 | 3074.75  |
| 89.0443  | 388.9468 | 843.6341 | 1180.507 | 1480.585 | 3075.737 |
| 94.6936  | 401.3515 | 849.7431 | 1184.633 | 1489.666 | 3077.725 |
| 107.8766 | 410.8326 | 853.4123 | 1187.509 | 1492.972 | 3080.361 |
| 116.7737 | 414.9151 | 870.6237 | 1196.61  | 1495.058 | 3081.248 |
| 121.7158 | 432.4023 | 885.9698 | 1202.093 | 1509.074 | 3084.359 |
| 123.0176 | 448.6444 | 901.857  | 1203.859 | 1512.596 | 3110.495 |
| 128.8587 | 470.0457 | 903.9873 | 1211.283 | 1512.808 | 3119.862 |
| 129.3667 | 472.4392 | 914.0227 | 1217.693 | 1513.211 | 3120.365 |
| 132.5299 | 476.3848 | 927.5612 | 1228.166 | 1516.029 | 3121.672 |
| 134.9233 | 488.5153 | 930.6865 | 1237.655 | 1517.002 | 3126.467 |
| 140.0078 | 506.3061 | 933.3935 | 1259.805 | 1522.731 | 3132.359 |
| 147.7273 | 528.9308 | 941.3063 | 1265.616 | 1523.762 | 3135.054 |
| 161.337  | 534.7007 | 948.8163 | 1277.601 | 1525.929 | 3146.232 |
| 167.372  | 552.0746 | 958.9711 | 1297.873 | 1526.423 | 3149.506 |
| 172.2993 | 569.2409 | 968.9846 | 1310.296 | 1527.637 | 3156.807 |
| 178.4006 | 575.0682 | 986.9972 | 1311.481 | 1527.782 | 3157.957 |
| 185.4195 | 576.5575 | 989.0976 | 1320.573 | 1534.015 | 3175.355 |
| 191.1003 | 583.0433 | 993.2882 | 1328.738 | 1540.543 | 3177.743 |
| 198.4879 | 618.6264 | 1003.746 | 1336.694 | 1545.953 | 3185.383 |
| 201.5721 | 637.8746 | 1008.192 | 1340.956 | 1562.397 | 3211.542 |
| 208.5516 | 640.9052 | 1015.128 | 1343.336 | 1577.558 | 3229.775 |
| 210.2801 | 669.0326 | 1022.555 | 1347.081 | 1599.448 | 3236.257 |
| 228.5269 | 671.2643 | 1028.709 | 1349.73  | 1625.803 | 3242.09  |

|          |          |          |          |          |          |
|----------|----------|----------|----------|----------|----------|
| 229.0105 | 686.7814 | 1030.633 | 1361.809 | 1638.126 | 3259.703 |
| 235.8247 | 693.1521 | 1039.662 | 1372.418 | 1677.077 |          |
| 240.9382 | 697.4235 | 1048.039 | 1376.41  | 1730.061 |          |
| 246.4869 | 709.8973 | 1063.185 | 1384.579 | 1735.914 |          |

---

Table S9. Dimensionless displacements ( $\delta$ ) of chlorophyll a normal modes (n) calculated using CAM-B3LYP functional with 6-31G (d) basis set.

| n  | $\delta$  | n  | $\delta$ | n   | $\delta$ | n   | $\delta$ | n   | $\delta$ | n   | $\delta$ |
|----|-----------|----|----------|-----|----------|-----|----------|-----|----------|-----|----------|
| 1  | 33.4746   | 43 | -3.15461 | 85  | 0.095745 | 127 | -0.70819 | 169 | -0.11142 | 211 | -0.01426 |
| 2  | 13.9592   | 44 | 1.4687   | 86  | -0.94924 | 128 | 0.818405 | 170 | 0.499479 | 212 | 0.375928 |
| 3  | 41.6757   | 45 | 0.263922 | 87  | -0.6355  | 129 | -0.78926 | 171 | 0.094264 | 213 | 0.252301 |
| 4  | -16.962   | 46 | -0.2658  | 88  | -0.1343  | 130 | -0.11105 | 172 | 0.207575 | 214 | 0.025171 |
| 5  | -10.3347  | 47 | -0.07958 | 89  | -3.40713 | 131 | 0.444346 | 173 | -0.2502  | 215 | 1.52912  |
| 6  | 41.346    | 48 | 2.78124  | 90  | 1.46628  | 132 | 0.192033 | 174 | -0.00598 | 216 | -0.15074 |
| 7  | -36.9205  | 49 | -1.26858 | 91  | -1.5324  | 133 | -0.25378 | 175 | -0.87951 | 217 | -0.01077 |
| 8  | 2.12973   | 50 | -1.223   | 92  | 0.271639 | 134 | -0.52181 | 176 | -0.12997 | 218 | -0.2237  |
| 9  | -15.6558  | 51 | -0.73201 | 93  | 0.819387 | 135 | 0.640049 | 177 | -0.38205 | 219 | 1.10567  |
| 10 | 18.7425   | 52 | -0.17944 | 94  | 2.15929  | 136 | 1.04908  | 178 | 0.881713 | 220 | 0.444904 |
| 11 | 15.3836   | 53 | -1.99073 | 95  | 0.944051 | 137 | 0.085335 | 179 | -0.00417 | 221 | -0.41838 |
| 12 | -31.5036  | 54 | 1.53594  | 96  | -0.25827 | 138 | 0.527816 | 180 | 0.7267   | 222 | 0.009897 |
| 13 | 3.19918   | 55 | 2.77102  | 97  | 0.195637 | 139 | -1.64239 | 181 | 0.082995 | 223 | -0.06515 |
| 14 | -2.77557  | 56 | -0.91955 | 98  | -0.51353 | 140 | 0.309776 | 182 | 0.037925 | 224 | -0.01955 |
| 15 | -11.7955  | 57 | -1.22602 | 99  | 0.26925  | 141 | -0.78301 | 183 | 0.461108 | 225 | -0.05266 |
| 16 | -18.8608  | 58 | 2.55739  | 100 | 0.572524 | 142 | -1.0029  | 184 | 0.760799 | 226 | -0.00112 |
| 17 | -5.66861  | 59 | -1.32455 | 101 | -0.08244 | 143 | 2.18004  | 185 | 0.679826 | 227 | 0.003483 |
| 18 | 4.74174   | 60 | 0.291322 | 102 | -0.54048 | 144 | -0.40257 | 186 | 0.003127 | 228 | -0.02953 |
| 19 | -6.3398   | 61 | 0.576431 | 103 | -0.21495 | 145 | -0.31457 | 187 | -0.34555 | 229 | -0.00289 |
| 20 | 0.190271  | 62 | 0.683232 | 104 | 1.22909  | 146 | 1.42064  | 188 | -0.49159 | 230 | -0.0116  |
| 21 | -0.644859 | 63 | 1.17248  | 105 | -0.54323 | 147 | 0.140233 | 189 | 0.155533 | 231 | 0.40682  |
| 22 | -2.28174  | 64 | 2.23727  | 106 | 2.65731  | 148 | 0.929742 | 190 | 0.163172 | 232 | -0.02354 |
| 23 | -3.70158  | 65 | 1.82166  | 107 | 1.16072  | 149 | -0.52868 | 191 | 0.138094 | 233 | -0.02956 |
| 24 | -0.643825 | 66 | -0.77868 | 108 | -0.06466 | 150 | -0.80667 | 192 | -0.11119 | 234 | -0.13558 |
| 25 | 4.01129   | 67 | 1.83242  | 109 | 0.039761 | 151 | 0.930259 | 193 | -0.78359 | 235 | -0.01852 |
| 26 | 7.79859   | 68 | -1.91807 | 110 | -1.48823 | 152 | -3.74361 | 194 | -0.19772 | 236 | 0.006701 |
| 27 | 6.50439   | 69 | -1.59473 | 111 | 0.003611 | 153 | -1.9575  | 195 | -0.10492 | 237 | 0.014517 |
| 28 | -4.1157   | 70 | -0.53419 | 112 | -1.42196 | 154 | -0.2992  | 196 | 0.156308 | 238 | -0.01525 |
| 29 | 1.54834   | 71 | -1.47952 | 113 | 0.214032 | 155 | 1.50726  | 197 | 0.155833 | 239 | 0.05461  |
| 30 | 3.78521   | 72 | 0.516475 | 114 | 0.39151  | 156 | -0.54209 | 198 | -0.48451 | 240 | -0.19377 |
| 31 | -2.70305  | 73 | 1.46983  | 115 | -0.0074  | 157 | -1.15506 | 199 | 0.459945 | 241 | 0.204968 |
| 32 | 3.76605   | 74 | -0.82265 | 116 | -0.26863 | 158 | 1.03417  | 200 | -0.07341 | 242 | 0.008734 |
| 33 | -1.87025  | 75 | 1.26389  | 117 | -4.60375 | 159 | -0.38169 | 201 | -0.90415 | 243 | 0.008445 |
| 34 | -1.65588  | 76 | -0.10794 | 118 | 0.752536 | 160 | 0.070782 | 202 | 2.51592  | 244 | -0.27399 |
| 35 | 2.01914   | 77 | 1.08422  | 119 | -0.11884 | 161 | -0.01395 | 203 | -0.42523 | 245 | -0.59167 |
| 36 | -0.635426 | 78 | -0.36782 | 120 | 0.055994 | 162 | -0.67223 | 204 | 2.11249  | 246 | -0.00815 |
| 37 | 4.34028   | 79 | 0.332361 | 121 | 0.078874 | 163 | -0.66249 | 205 | 0.46036  | 247 | 0.012327 |
| 38 | -1.55607  | 80 | 0.34084  | 122 | -0.10897 | 164 | 0.98235  | 206 | 1.08319  | 248 | 0.117622 |
| 39 | -1.19897  | 81 | -1.48731 | 123 | -1.74314 | 165 | -4.47469 | 207 | 0.337611 | 249 | -0.07171 |
| 40 | -2.65367  | 82 | 0.482347 | 124 | -0.01851 | 166 | -0.49652 | 208 | 1.45246  | 250 | -0.13034 |
| 41 | -1.67822  | 83 | 0.439125 | 125 | 0.058768 | 167 | 1.01484  | 209 | -0.8564  | 251 | 0.003019 |
| 42 | 1.88576   | 84 | -0.91704 | 126 | -0.29524 | 168 | 0.262865 | 210 | 0.909355 | 252 | 0.379305 |

Table S10. Dimensionless displacements ( $\delta$ ) of chlorophyll a normal modes (n) calculated using B3LYP functional with 6-31G (d) basis set.

| n | $\delta$ | n | $\delta$ | n  | $\delta$ | n  | $\delta$ | n  | $\delta$ | n  | $\delta$ |
|---|----------|---|----------|----|----------|----|----------|----|----------|----|----------|
| 1 | 4.35058  | 4 | -        | 85 | 0.30157  | 12 | 0.04932  | 16 | -        | 21 | -        |
| 2 | -37.588  | 4 | -        | 86 | -        | 12 | -        | 17 | -        | 21 | 0.46410  |
| 3 | 39.6875  | 4 | 0.55962  | 87 | -        | 12 | -        | 17 | -0.1078  | 21 | 0.37818  |
| 4 | -        | 4 | -        | 88 | 0.18459  | 13 | 0.42039  | 17 | 0.70216  | 21 | 0.06833  |
| 5 | 16.7216  | 4 | 0.68843  | 89 | 0.47707  | 13 | -        | 17 | 0.37410  | 21 | 0.83799  |
| 6 | -        | 4 | 2.55961  | 90 | -        | 13 | -        | 17 | -        | 21 | -        |
| 7 | 11.2846  | 4 | 1.28566  | 91 | -        | 13 | 0.38182  | 17 | -        | 21 | -        |
| 8 | -        | 5 | 0.06662  | 92 | 0.44677  | 13 | 0.21366  | 17 | -        | 21 | 0.09634  |
| 9 | -        | 5 | 1.77021  | 93 | 0.26754  | 13 | -        | 17 | 0.10527  | 21 | 0.08609  |
| 1 | -        | 5 | -        | 94 | -        | 13 | -        | 17 | -        | 22 | 0.00796  |
| 1 | 16.6519  | 5 | -        | 95 | 1.62442  | 13 | 0.5635   | 17 | -        | 22 | 0.04936  |
| 1 | -        | 5 | -        | 96 | -        | 13 | -        | 18 | -        | 22 | 0.07046  |
| 1 | 11.1514  | 5 | 2.9064   | 97 | 0.32982  | 13 | 0.25358  | 18 | -        | 22 | 0.03189  |
| 1 | 1.17269  | 5 | 1.14593  | 98 | -        | 14 | -        | 18 | -        | 22 | 0.00283  |
| 1 | -        | 5 | 0.77068  | 99 | 0.60503  | 14 | -        | 18 | 0.85975  | 22 | 0.01985  |
| 1 | -        | 5 | -1.9577  | 10 | 0.06471  | 14 | 0.31978  | 18 | -        | 22 | -        |
| 1 | 9.89301  | 5 | 0.20537  | 10 | -        | 14 | 0.76859  | 18 | 0.03969  | 22 | -        |
| 1 | -        | 6 | 0.19055  | 10 | -        | 14 | 0.29005  | 18 | 0.21197  | 22 | -        |
| 1 | 2.3075   | 6 | 0.05088  | 10 | 0.96809  | 14 | 0.70516  | 18 | 0.77848  | 22 | -        |
| 2 | 0.64627  | 6 | 0.33217  | 10 | 0.06061  | 14 | 0.76915  | 18 | -        | 23 | 0.00023  |
| 2 | 0.47549  | 6 | 0.24192  | 10 | 0.10605  | 14 | 0.78063  | 18 | -        | 23 | -        |
| 2 | -        | 6 | 1.74938  | 10 | -        | 14 | 1.43051  | 19 | -        | 23 | 0.31672  |
| 2 | -        | 6 | -        | 10 | -        | 14 | 0.06577  | 19 | 0.04103  | 23 | 0.01037  |
| 2 | 0.40212  | 6 | -        | 10 | 0.44947  | 15 | -        | 19 | 0.04263  | 23 | -        |
| 2 | 2.62326  | 6 | 0.45151  | 10 | 0.81312  | 15 | -        | 19 | 0.01598  | 23 | 0.01903  |
| 2 | -        | 6 | 0.25071  | 11 | 0.70524  | 15 | -        | 19 | 0.18629  | 23 | -        |
| 2 | -        | 6 | 1.76894  | 11 | 0.61374  | 15 | -        | 19 | 0.00527  | 23 | -        |
| 2 | -        | 7 | 0.54828  | 11 | -0.0087  | 15 | 0.33278  | 19 | 0.09795  | 23 | 0.00345  |
| 2 | 1.59253  | 7 | -        | 11 | 0.35857  | 15 | 0.53327  | 19 | -        | 23 | 0.03889  |
| 3 | -        | 7 | 0.33840  | 11 | -        | 15 | -        | 19 | -        | 24 | -0.0048  |
| 3 | -2.6011  | 7 | 1.47623  | 11 | 0.03668  | 15 | -        | 19 | -        | 24 | 0.0309   |
| 3 | 1.90577  | 7 | -        | 11 | -        | 15 | -        | 20 | -        | 24 | 0.00723  |
| 3 | -        | 7 | 0.61601  | 11 | 2.53948  | 15 | -        | 20 | -        | 24 | -        |
| 3 | -        | 7 | 0.08141  | 11 | 0.08160  | 16 | 0.26388  | 20 | 0.62884  | 24 | 0.02773  |
| 3 | 3.78946  | 7 | 0.57892  | 11 | 0.10777  | 16 | -        | 20 | 0.49495  | 24 | -        |
| 3 | 1.4176   | 7 | -1.0968  | 12 | -        | 16 | -        | 20 | -        | 24 | -        |
| 3 | 1.97536  | 7 | -        | 12 | -        | 16 | -        | 20 | -        | 24 | 0.00557  |
| 3 | 0.54238  | 8 | -        | 12 | 0.07158  | 16 | -        | 20 | 0.61635  | 24 | -        |
| 3 | 0.01622  | 8 | 0.80643  | 12 | -0.4725  | 16 | 2.52879  | 20 | -        | 24 | 0.07629  |
| 4 | -        | 8 | -        | 12 | 0.02732  | 16 | -        | 20 | -        | 25 | -        |
| 4 | -        | 8 | -        | 12 | -        | 16 | -        | 20 | 0.38563  | 25 | 0.0133   |
| 4 | 2.61936  | 8 | -        | 12 | 0.00684  | 16 | 0.23311  | 21 | 0.25473  | 25 | 0.28322  |

Table S11. Cartesian coordinates of ground state chlorophyll a (CAM-B3LYP functional with 6-31G (d) basis set)

---

|    |          |          |          |
|----|----------|----------|----------|
| C  | -1.66352 | -3.84832 | -0.09832 |
| C  | -0.24333 | -3.54237 | -0.01687 |
| C  | -0.08212 | -2.13826 | -0.05982 |
| C  | -1.29543 | -1.41182 | -0.15022 |
| C  | -2.40942 | -2.4496  | -0.13166 |
| C  | 1.02613  | -4.09512 | 0.08341  |
| C  | 1.91745  | -2.96292 | 0.09829  |
| N  | 1.1921   | -1.77952 | 0.00587  |
| C  | -1.37371 | -0.05097 | -0.23579 |
| N  | -0.25277 | 0.75465  | -0.25947 |
| C  | -0.60985 | 2.03688  | -0.46349 |
| C  | -2.10398 | 2.16568  | -0.71731 |
| C  | -2.64075 | 0.77864  | -0.30397 |
| C  | 0.23744  | 3.13689  | -0.49098 |
| C  | 1.63438  | 3.15335  | -0.34812 |
| C  | 2.46194  | 4.35353  | -0.36928 |
| C  | 3.75591  | 3.93533  | -0.22403 |
| C  | 3.7192   | 2.47902  | -0.10254 |
| N  | 2.40779  | 2.05752  | -0.18431 |
| C  | 4.98033  | 4.73239  | -0.16078 |
| C  | 5.22016  | 5.85621  | -0.84247 |
| C  | 1.9384   | 5.74894  | -0.48281 |
| Mg | 1.78018  | 0.13855  | -0.08215 |
| N  | 3.72366  | -0.54166 | 0.09486  |
| C  | 4.82792  | 0.23787  | 0.13209  |
| C  | 6.01362  | -0.57065 | 0.26814  |
| C  | 5.59054  | -1.87745 | 0.30791  |
| C  | 4.15022  | -1.84743 | 0.19886  |
| C  | 4.81081  | 1.65367  | 0.03826  |
| C  | -2.39299 | 2.50804  | -2.18356 |
| C  | -3.38327 | 0.79229  | 1.04288  |
| C  | -4.75264 | 1.45762  | 0.94087  |
| C  | -5.45922 | 1.5159   | 2.28082  |
| O  | -4.95675 | 1.14686  | 3.31124  |
| C  | 7.41414  | -0.04621 | 0.35087  |
| C  | 3.30884  | -2.96318 | 0.1923   |
| C  | 6.43155  | -3.10864 | 0.47486  |
| C  | 6.608    | -3.52563 | 1.94132  |
| C  | 1.40456  | -5.53917 | 0.14895  |
| C  | -3.34189 | -2.41818 | -1.32176 |
| O  | -3.04044 | -2.06781 | -2.44034 |
| O  | -2.24045 | -4.91426 | -0.13304 |
| O  | -4.56284 | -2.8589  | -0.99071 |
| C  | -5.48769 | -3.01029 | -2.07166 |
| O  | -6.70763 | 2.04176  | 2.32802  |
| C  | -7.45572 | 2.3802   | 1.15263  |

|   |          |          |          |
|---|----------|----------|----------|
| C | -8.15069 | 1.18632  | 0.57016  |
| H | -0.2409  | 4.09717  | -0.65336 |
| H | 5.78159  | 2.13745  | 0.06861  |
| H | -3.30637 | 0.3763   | -1.07722 |
| H | 3.79044  | -3.93382 | 0.26973  |
| H | -2.51756 | 2.95718  | -0.08137 |
| H | 5.75979  | 4.35752  | 0.50066  |
| H | -3.01973 | -2.41086 | 0.77687  |
| H | -1.99995 | 1.73108  | -2.84746 |
| H | -3.47254 | 2.58279  | -2.35506 |
| H | -1.93585 | 3.46052  | -2.46792 |
| H | -5.6699  | -2.04838 | -2.55639 |
| H | -6.40118 | -3.39552 | -1.62086 |
| H | -5.09441 | -3.71541 | -2.8068  |
| H | 0.99291  | 5.86362  | 0.05608  |
| H | 1.75548  | 6.0347   | -1.52644 |
| H | 2.65102  | 6.46613  | -0.06681 |
| H | -3.51637 | -0.22862 | 1.411    |
| H | -2.77488 | 1.30502  | 1.79521  |
| H | -5.38445 | 0.91906  | 0.22533  |
| H | -4.66081 | 2.48208  | 0.55685  |
| H | 2.06575  | -5.74469 | 0.99785  |
| H | 0.51382  | -6.1629  | 0.24978  |
| H | 1.93185  | -5.85267 | -0.75974 |
| H | -6.82861 | 2.88222  | 0.40987  |
| H | -8.18942 | 3.10482  | 1.51589  |
| H | 7.57729  | 0.53398  | 1.26711  |
| H | 8.14339  | -0.86053 | 0.34922  |
| H | 7.65329  | 0.60817  | -0.4952  |
| H | 7.4179   | -2.93875 | 0.02915  |
| H | 5.99243  | -3.94014 | -0.08804 |
| H | 7.22467  | -4.4275  | 2.01965  |
| H | 7.09224  | -2.73071 | 2.51765  |
| H | 5.64111  | -3.73166 | 2.4116   |
| H | 6.15831  | 6.3898   | -0.72546 |
| H | 4.50873  | 6.26647  | -1.55236 |
| C | -8.16916 | 0.89367  | -0.72705 |
| H | -8.68446 | 0.56413  | 1.28649  |
| H | -7.64158 | 1.50182  | -1.45922 |
| H | -8.72265 | 0.04179  | -1.10988 |

Table S12. Cartesian coordinates of excited state chlorophyll a (CAM-B3LYP functional with 6-31G (d) basis set)

|   |          |          |          |
|---|----------|----------|----------|
| C | -1.66995 | -3.85435 | -0.07817 |
| C | -0.25035 | -3.54912 | 0.0002   |

|    |          |          |          |
|----|----------|----------|----------|
| C  | -0.09067 | -2.13819 | -0.05424 |
| C  | -1.30106 | -1.42099 | -0.14946 |
| C  | -2.41507 | -2.45551 | -0.12386 |
| C  | 1.01646  | -4.09772 | 0.10406  |
| C  | 1.91404  | -2.95545 | 0.10919  |
| N  | 1.19111  | -1.7762  | 0.00846  |
| C  | -1.37141 | -0.05047 | -0.24848 |
| N  | -0.24906 | 0.7455   | -0.28006 |
| C  | -0.61498 | 2.03803  | -0.4998  |
| C  | -2.10402 | 2.1523   | -0.76976 |
| C  | -2.63656 | 0.77534  | -0.32243 |
| C  | 0.22677  | 3.13872  | -0.52478 |
| C  | 1.62961  | 3.17282  | -0.372   |
| C  | 2.4467   | 4.35816  | -0.3864  |
| C  | 3.75313  | 3.93422  | -0.23056 |
| C  | 3.70766  | 2.4873   | -0.11458 |
| N  | 2.41314  | 2.06251  | -0.20413 |
| C  | 4.97708  | 4.72088  | -0.15676 |
| C  | 5.19759  | 5.91722  | -0.7165  |
| C  | 1.93704  | 5.75908  | -0.49831 |
| Mg | 1.77832  | 0.14521  | -0.09283 |
| N  | 3.71483  | -0.54215 | 0.09743  |
| C  | 4.83011  | 0.25293  | 0.12661  |
| C  | 6.02436  | -0.57591 | 0.26301  |
| C  | 5.60056  | -1.86985 | 0.30997  |
| C  | 4.14248  | -1.83647 | 0.20409  |
| C  | 4.82276  | 1.64056  | 0.03216  |



|   |          |          |          |
|---|----------|----------|----------|
| C | -2.38745 | 2.44647  | -2.24916 |
| C | -3.36359 | 0.81627  | 1.03403  |
| C | -4.73463 | 1.47894  | 0.93489  |
| C | -5.42615 | 1.55459  | 2.282    |
| O | -4.91095 | 1.19851  | 3.31071  |
| C | 7.42007  | -0.04553 | 0.33498  |
| C | 3.31037  | -2.96665 | 0.20331  |
| C | 6.42224  | -3.11308 | 0.47159  |
| C | 6.4986   | -3.6043  | 1.92405  |
| C | 1.41238  | -5.53313 | 0.19311  |
| C | -3.34516 | -2.43234 | -1.31625 |
| O | -3.04869 | -2.06276 | -2.43029 |
| O | -2.24582 | -4.92264 | -0.1039  |
| O | -4.5562  | -2.9031  | -0.99272 |
| C | -5.47491 | -3.06677 | -2.07724 |
| O | -6.6741  | 2.07956  | 2.3369   |
| C | -7.43555 | 2.40467  | 1.16619  |
| C | -8.13331 | 1.20353  | 0.60236  |
| H | 0.25779  | 4.09398  | -0.69835 |
| H | 5.79238  | 2.12495  | 0.06101  |
| H | -3.30982 | 0.35271  | -1.07793 |
| H | 3.79244  | -3.93507 | 0.28392  |
| H | -2.52762 | 2.96122  | -0.16296 |
| H | 5.79152  | 4.27579  | 0.41299  |
| H | -3.02782 | -2.40974 | 0.78311  |
| H | -1.98732 | 1.65052  | -2.88569 |
| H | -3.46671 | 2.51037  | -2.42752 |

|   |          |          |          |
|---|----------|----------|----------|
| H | -1.93339 | 3.39171  | -2.56061 |
| H | -5.67797 | -2.1054  | -2.55471 |
| H | -6.3803  | -3.47648 | -1.63178 |
| H | -5.06388 | -3.75689 | -2.81686 |
| H | 0.92377  | 5.85036  | -0.09626 |
| H | 1.90803  | 6.10833  | -1.53885 |
| H | 2.57795  | 6.45033  | 0.05744  |
| H | -3.49157 | -0.19675 | 1.42484  |
| H | -2.746   | 1.34531  | 1.76725  |
| H | -5.37366 | 0.92996  | 0.23386  |
| H | -4.64677 | 2.49776  | 0.5355   |
| H | 1.9582   | -5.74156 | 1.12155  |
| H | 0.53026  | -6.17632 | 0.16553  |
| H | 2.06879  | -5.8191  | -0.63797 |
| H | -6.81762 | 2.90169  | 0.41244  |
| H | -8.16728 | 3.13067  | 1.53059  |
| H | 7.56499  | 0.58143  | 1.22282  |
| H | 8.15289  | -0.85473 | 0.38175  |
| H | 7.66092  | 0.5704   | -0.53914 |
| H | 7.43637  | -2.92983 | 0.10096  |
| H | 6.01386  | -3.91043 | -0.16074 |
| H | 7.09466  | -4.52036 | 1.99426  |
| H | 6.95963  | -2.84751 | 2.5668   |
| H | 5.50224  | -3.81539 | 2.32513  |
| H | 6.14893  | 6.42339  | -0.58541 |
| H | 4.46058  | 6.41694  | -1.33612 |
| C | -8.16533 | 0.89892  | -0.69183 |

---

|   |          |         |          |
|---|----------|---------|----------|
| H | -8.65752 | 0.5866  | 1.33021  |
| H | -7.64769 | 1.50178 | -1.4354  |
| H | -8.7207  | 0.0421  | -1.06059 |

---

Table S13. Cartesian coordinates of ground state chlorophyll f (CAM-B3LYP functional with 6-31G (d) basis set)

---

|   |          |          |          |
|---|----------|----------|----------|
| C | -1.68218 | -3.94285 | 0.00138  |
| C | -0.25697 | -3.63037 | 0.05728  |
| C | -0.10563 | -2.21859 | -0.02069 |
| C | -1.3185  | -1.51144 | -0.11362 |
| C | -2.43115 | -2.55051 | -0.0652  |
| C | 1.00587  | -4.17366 | 0.14568  |
| C | 1.903    | -3.02771 | 0.11913  |
| N | 1.16818  | -1.85176 | 0.01559  |
| C | -1.4013  | -0.14336 | -0.23616 |
| N | -0.29408 | 0.65684  | -0.29184 |
| C | -0.6619  | 1.94579  | -0.51991 |
| C | -2.15939 | 2.05496  | -0.75657 |
| C | -2.67771 | 0.67085  | -0.31229 |
| C | 0.16968  | 3.04277  | -0.57989 |
| C | 1.57521  | 3.07391  | -0.43742 |
| C | 2.40018  | 4.26469  | -0.4742  |
| C | 3.71015  | 3.85851  | -0.27875 |
| C | 3.67447  | 2.42089  | -0.1617  |
| N | 2.3617   | 1.99443  | -0.24623 |
| C | 4.89797  | 4.71568  | -0.21735 |
| C | 5.87467  | 4.61268  | 0.68765  |

|    |          |          |          |
|----|----------|----------|----------|
| C  | 1.96932  | 5.64704  | -0.63576 |
| Mg | 1.74172  | 0.06928  | -0.11806 |
| N  | 3.6915   | -0.60699 | 0.04455  |
| C  | 4.8024   | 0.18438  | 0.03486  |
| C  | 5.99128  | -0.62367 | 0.13437  |
| C  | 5.56925  | -1.92986 | 0.20455  |
| C  | 4.12683  | -1.89744 | 0.14574  |
| C  | 4.77777  | 1.58561  | -0.05851 |
| C  | -2.47323 | 2.3719   | -2.22321 |
| C  | -3.40828 | 0.69633  | 1.04099  |
| C  | -4.77272 | 1.37348  | 0.95109  |
| C  | -5.48351 | 1.39196  | 2.29009  |
| O  | -4.99596 | 0.96051  | 3.30352  |
| C  | 7.39447  | -0.10141 | 0.16162  |
| C  | 3.28435  | -3.02878 | 0.17867  |
| C  | 6.41374  | -3.16149 | 0.3523   |
| C  | 6.63033  | -3.57575 | 1.81405  |
| C  | 1.39802  | -5.61065 | 0.24375  |
| C  | -3.35947 | -2.55406 | -1.26126 |
| O  | -3.04605 | -2.2452  | -2.38841 |
| O  | -2.24859 | -5.01325 | 0.0027   |
| O  | -4.58465 | -2.9727  | -0.92176 |
| C  | -5.50869 | -3.14635 | -2.00118 |
| O  | -6.71775 | 1.94649  | 2.35703  |
| C  | -7.4486  | 2.36643  | 1.197    |
| C  | -8.17007 | 1.22394  | 0.54756  |
| H  | -0.29582 | 4.0047   | -0.75813 |

|   |          |          |          |
|---|----------|----------|----------|
| H | 5.7439   | 2.07788  | -0.06796 |
| H | -3.34412 | 0.24427  | -1.07193 |
| H | 3.7726   | -3.99546 | 0.25725  |
| H | -2.56997 | 2.85344  | -0.12859 |
| H | 4.96087  | 5.50888  | -0.96    |
| H | -3.04512 | -2.48973 | 0.83958  |
| H | -2.07786 | 1.59196  | -2.88255 |
| H | -3.55615 | 2.42887  | -2.38051 |
| H | -2.03383 | 3.32729  | -2.5238  |
| H | -5.67655 | -2.19767 | -2.5159  |
| H | -6.42821 | -3.50534 | -1.54135 |
| H | -5.12187 | -3.87914 | -2.7122  |
| H | 2.78013  | 6.39905  | -0.57926 |
| H | -3.54746 | -0.32103 | 1.41605  |
| H | -2.78864 | 1.20815  | 1.78489  |
| H | -5.40709 | 0.86082  | 0.21858  |
| H | -4.67143 | 2.40731  | 0.59739  |
| H | 1.96318  | -5.80739 | 1.16181  |
| H | 0.51244  | -6.24931 | 0.24461  |
| H | 2.032    | -5.90733 | -0.59945 |
| H | -6.80373 | 2.89127  | 0.48608  |
| H | -8.16591 | 3.08941  | 1.59451  |
| H | 7.59421  | 0.47675  | 1.07177  |
| H | 8.12158  | -0.91683 | 0.13     |
| H | 7.60012  | 0.55408  | -0.69186 |
| H | 7.38753  | -2.99343 | -0.12066 |
| H | 5.95972  | -3.99408 | -0.19728 |

|   |          |          |          |
|---|----------|----------|----------|
| H | 7.24788  | -4.47812 | 1.87736  |
| H | 7.13145  | -2.78018 | 2.37483  |
| H | 5.67712  | -3.77973 | 2.31256  |
| H | 6.72185  | 5.29131  | 0.6722   |
| H | 5.84744  | 3.87593  | 1.48498  |
| C | -8.18747 | 1.00192  | -0.76364 |
| H | -8.72548 | 0.57908  | 1.22647  |
| H | -7.63922 | 1.63435  | -1.4591  |
| H | -8.7613  | 0.18739  | -1.19483 |
| O | 0.82313  | 6.02029  | -0.82134 |

---

Table S14. Cartesian coordinates of excited state chlorophyll f (CAM-B3LYP functional with 6-31G (d) basis set)

|    |          |          |          |
|----|----------|----------|----------|
| C  | -1.67077 | -3.95125 | -0.00868 |
| C  | -0.25174 | -3.63429 | 0.05092  |
| C  | -0.10408 | -2.22362 | -0.01585 |
| C  | -1.32032 | -1.5167  | -0.10555 |
| C  | -2.42672 | -2.55959 | -0.05912 |
| C  | 1.02043  | -4.17275 | 0.13778  |
| C  | 1.9081   | -3.0236  | 0.12016  |
| N  | 1.17655  | -1.85152 | 0.02533  |
| C  | -1.40357 | -0.14862 | -0.22444 |
| N  | -0.28512 | 0.65524  | -0.27808 |
| C  | -0.66058 | 1.93834  | -0.51406 |
| C  | -2.15363 | 2.04812  | -0.75177 |
| C  | -2.67448 | 0.66671  | -0.30556 |
| C  | 0.16992  | 3.04949  | -0.57559 |
| C  | 1.56816  | 3.08969  | -0.4324  |
| C  | 2.38536  | 4.28109  | -0.46535 |
| C  | 3.70164  | 3.87755  | -0.25893 |
| C  | 3.6676   | 2.43532  | -0.14654 |
| N  | 2.3698   | 2.00136  | -0.23755 |
| C  | 4.87426  | 4.74462  | -0.19854 |
| C  | 5.93008  | 4.59377  | 0.61008  |
| C  | 1.9342   | 5.6529   | -0.62629 |
| Mg | 1.7467   | 0.07309  | -0.1038  |

|   |          |          |          |
|---|----------|----------|----------|
| N | 3.69141  | -0.59753 | 0.05742  |
| C | 4.80115  | 0.20049  | 0.04371  |
| C | 6.00591  | -0.62129 | 0.13634  |
| C | 5.59155  | -1.9165  | 0.20557  |
| C | 4.13029  | -1.89205 | 0.15259  |
| C | 4.78913  | 1.59011  | -0.04272 |
| C | -2.46804 | 2.36487  | -2.22015 |
| C | -3.41272 | 0.69911  | 1.04511  |
| C | -4.77577 | 1.3776   | 0.94385  |
| C | -5.49197 | 1.40441  | 2.28008  |
| O | -5.00665 | 0.98072  | 3.29783  |
| C | 7.39922  | -0.08085 | 0.15406  |
| C | 3.30772  | -3.02413 | 0.18091  |
| C | 6.42622  | -3.15395 | 0.34331  |
| C | 6.56174  | -3.63361 | 1.79529  |
| C | 1.42811  | -5.60496 | 0.22758  |
| C | -3.36662 | -2.553   | -1.2446  |
| O | -3.07688 | -2.19641 | -2.36456 |
| O | -2.23693 | -5.0241  | -0.01902 |
| O | -4.57332 | -3.02163 | -0.90627 |
| C | -5.5023  | -3.19645 | -1.98105 |
| O | -6.72678 | 1.95745  | 2.33844  |
| C | -7.45434 | 2.36744  | 1.17255  |
| C | -8.16939 | 1.21834  | 0.52776  |
| H | -0.3028  | 4.00746  | -0.75503 |
| H | 5.7549   | 2.07916  | -0.06077 |
| H | -3.33793 | 0.23655  | -1.0656  |
| H | 3.79795  | -3.98924 | 0.25202  |
| H | -2.56021 | 2.85117  | -0.12636 |
| H | 4.86015  | 5.61006  | -0.85874 |
| H | -3.03082 | -2.5087  | 0.85306  |
| H | -2.08006 | 1.58021  | -2.87801 |
| H | -3.55099 | 2.42832  | -2.37302 |
| H | -2.02386 | 3.31693  | -2.52353 |
| H | -5.70922 | -2.23986 | -2.46615 |
| H | -6.40351 | -3.60099 | -1.52281 |
| H | -5.09782 | -3.89439 | -2.71686 |
| H | 2.72821  | 6.42109  | -0.55945 |
| H | -3.55477 | -0.31676 | 1.42281  |
| H | -2.79625 | 1.21334  | 1.78989  |
| H | -5.40715 | 0.8616   | 0.21123  |
| H | -4.67146 | 2.40951  | 0.58518  |
| H | 1.99045  | -5.80469 | 1.14786  |

|   |          |          |          |
|---|----------|----------|----------|
| H | 0.55016  | -6.25425 | 0.21808  |
| H | 2.07201  | -5.89068 | -0.61315 |
| H | -6.80809 | 2.88978  | 0.46099  |
| H | -8.17536 | 3.09075  | 1.56257  |
| H | 7.57518  | 0.54448  | 1.0375   |
| H | 8.13912  | -0.88471 | 0.16892  |
| H | 7.60023  | 0.54003  | -0.72652 |
| H | 7.42384  | -2.96696 | -0.06777 |
| H | 5.99862  | -3.95799 | -0.26716 |
| H | 7.16691  | -4.54467 | 1.84854  |
| H | 7.04168  | -2.86912 | 2.41458  |
| H | 5.58327  | -3.84929 | 2.236    |
| H | 6.75182  | 5.30261  | 0.58561  |
| H | 5.99464  | 3.79295  | 1.34012  |
| C | -8.18049 | 0.98756  | -0.782   |
| H | -8.72572 | 0.57631  | 1.20858  |
| H | -7.63157 | 1.61725  | -1.47943 |
| H | -8.74991 | 0.16837  | -1.21016 |
| O | 0.78057  | 6.00683  | -0.82243 |

Table S15. Cartesian coordinates of ground state chlorophyll a (B3LYP functional with 6-31G (d) basis set)

|   |          |          |          |
|---|----------|----------|----------|
| C | -1.64853 | -3.88394 | -0.07638 |
| C | -0.23019 | -3.55753 | -0.00367 |
| C | -0.07897 | -2.14594 | -0.0551  |
| C | -1.29374 | -1.42924 | -0.14696 |
| C | -2.40838 | -2.4733  | -0.1289  |
| C | 1.04473  | -4.10459 | 0.09847  |
| C | 1.93746  | -2.96204 | 0.10467  |
| N | 1.2043   | -1.7804  | 0.00635  |
| C | -1.38095 | -0.05396 | -0.23653 |
| N | -0.26596 | 0.75225  | -0.26711 |
| C | -0.62487 | 2.04522  | -0.47224 |
| C | -2.12543 | 2.1686   | -0.72347 |



|    |          |          |          |
|----|----------|----------|----------|
| C  | -2.6579  | 0.77182  | -0.30588 |
| C  | 0.22586  | 3.14411  | -0.50111 |
| C  | 1.62901  | 3.17803  | -0.36094 |
| C  | 2.44807  | 4.37665  | -0.38194 |
| C  | 3.75816  | 3.9607   | -0.2344  |
| C  | 3.72291  | 2.50538  | -0.11554 |
| N  | 2.41471  | 2.07603  | -0.19751 |
| C  | 4.97846  | 4.75786  | -0.16235 |
| C  | 5.2039   | 5.94246  | -0.75115 |
| C  | 1.92694  | 5.77717  | -0.49082 |
| Mg | 1.7895   | 0.14749  | -0.0907  |
| N  | 3.74084  | -0.53078 | 0.09004  |
| C  | 4.85087  | 0.26275  | 0.12104  |
| C  | 6.04388  | -0.55014 | 0.25699  |
| C  | 5.62221  | -1.86129 | 0.30388  |
| C  | 4.17363  | -1.83494 | 0.19832  |
| C  | 4.82708  | 1.6708   | 0.02466  |
| C  | -2.42384 | 2.51282  | -2.19397 |
| C  | -3.40777 | 0.78104  | 1.04559  |
| C  | -4.78238 | 1.45083  | 0.95247  |
| C  | -5.49604 | 1.47598  | 2.29745  |
| O  | -5.00716 | 1.05483  | 3.31766  |
| C  | 7.44553  | -0.02034 | 0.33235  |
| C  | 3.33333  | -2.95968 | 0.19628  |
| C  | 6.46159  | -3.09731 | 0.4754   |
| C  | 6.56313  | -3.56981 | 1.93887  |
| C  | 1.4233   | -5.55061 | 0.18342  |

|   |          |          |          |
|---|----------|----------|----------|
| C | -3.34325 | -2.44352 | -1.32522 |
| O | -3.10999 | -1.92396 | -2.39734 |
| O | -2.21246 | -4.95975 | -0.0921  |
| O | -4.48521 | -3.10204 | -1.0457  |
| C | -5.40226 | -3.24215 | -2.1417  |
| O | -6.74082 | 2.03136  | 2.3634   |
| C | -7.47333 | 2.44568  | 1.19342  |
| C | -8.18703 | 1.29646  | 0.53966  |
| H | -0.25738 | 4.10227  | -0.6667  |
| H | 5.79601  | 2.15907  | 0.05014  |
| H | -3.31844 | 0.36186  | -1.07914 |
| H | 3.81806  | -3.92847 | 0.27595  |
| H | -2.5436  | 2.95905  | -0.08729 |
| H | 5.78518  | 4.32919  | 0.43188  |
| H | -3.0261  | -2.4359  | 0.77684  |
| H | -2.03656 | 1.73435  | -2.86068 |
| H | -3.50484 | 2.59149  | -2.36019 |
| H | -1.96424 | 3.46483  | -2.48032 |
| H | -5.72799 | -2.26131 | -2.49967 |
| H | -6.24624 | -3.80678 | -1.74482 |
| H | -4.9326  | -3.78371 | -2.96681 |
| H | 0.93877  | 5.87405  | -0.02852 |
| H | 1.82931  | 6.10445  | -1.5355  |
| H | 2.60086  | 6.48228  | 0.00654  |
| H | -3.54227 | -0.2426  | 1.40903  |
| H | -2.80025 | 1.28864  | 1.8035   |
| H | -5.41408 | 0.93138  | 0.22055  |

---

|   |          |          |          |
|---|----------|----------|----------|
| H | -4.68892 | 2.48393  | 0.58908  |
| H | 1.96352  | -5.77278 | 1.11269  |
| H | 0.52878  | -6.17764 | 0.15152  |
| H | 2.07707  | -5.84583 | -0.64725 |
| H | -6.83102 | 2.97486  | 0.48138  |
| H | -8.19699 | 3.16662  | 1.589    |
| H | 7.61883  | 0.54367  | 1.2586   |
| H | 8.18163  | -0.82915 | 0.30251  |
| H | 7.66849  | 0.65661  | -0.50191 |
| H | 7.47116  | -2.91117 | 0.08956  |
| H | 6.05524  | -3.91147 | -0.13843 |
| H | 7.17513  | -4.47609 | 2.01509  |
| H | 7.01781  | -2.79701 | 2.56826  |
| H | 5.5726   | -3.79081 | 2.35118  |
| H | 6.15059  | 6.45819  | -0.61878 |
| H | 4.47652  | 6.42242  | -1.39798 |
| C | -8.19358 | 1.06515  | -0.77344 |
| H | -8.74512 | 0.65255  | 1.21827  |
| H | -7.64533 | 1.69632  | -1.47055 |
| H | -8.75901 | 0.24449  | -1.20578 |

---

Table S16. Cartesian coordinates of excited state chlorophyll a (B3LYP functional with 6-31G (d) basis set)

---

|   |          |          |          |
|---|----------|----------|----------|
| C | -1.65876 | -3.89063 | -0.06134 |
| C | -0.24308 | -3.566   | 0.00793  |
| C | -0.08856 | -2.15143 | -0.04778 |
| C | -1.30339 | -1.43577 | -0.14222 |

|    |          |          |          |
|----|----------|----------|----------|
| C  | -2.41715 | -2.47719 | -0.11911 |
| C  | 1.03307  | -4.11177 | 0.11389  |
| C  | 1.92976  | -2.96387 | 0.11619  |
| N  | 1.19938  | -1.78303 | 0.01406  |
| C  | -1.38067 | -0.05575 | -0.24139 |
| N  | -0.2567  | 0.74432  | -0.27846 |
| C  | -0.62371 | 2.04138  | -0.50322 |
| C  | -2.1186  | 2.15529  | -0.76737 |
| C  | -2.6515  | 0.77095  | -0.31649 |
| C  | 0.22153  | 3.14596  | -0.53553 |
| C  | 1.62727  | 3.19078  | -0.38698 |
| C  | 2.43921  | 4.38075  | -0.40344 |
| C  | 3.75725  | 3.96301  | -0.24476 |
| C  | 3.7172   | 2.50701  | -0.1291  |
| N  | 2.41902  | 2.07613  | -0.21773 |
| C  | 4.97563  | 4.74961  | -0.16238 |
| C  | 5.18937  | 5.98737  | -0.64529 |
| C  | 1.92498  | 5.78334  | -0.51518 |
| Mg | 1.78817  | 0.14726  | -0.09529 |
| N  | 3.73371  | -0.53431 | 0.09425  |
| C  | 4.85154  | 0.26613  | 0.11626  |
| C  | 6.04891  | -0.55858 | 0.2518   |
| C  | 5.6257   | -1.86252 | 0.30663  |
| C  | 4.16692  | -1.8339  | 0.20536  |
| C  | 4.83537  | 1.66147  | 0.01544  |
| C  | -2.41124 | 2.45622  | -2.25072 |
| C  | -3.3891  | 0.81157  | 1.04358  |

|   |          |          |          |
|---|----------|----------|----------|
| C | -4.76571 | 1.47661  | 0.94624  |
| C | -5.46576 | 1.5326   | 2.29764  |
| O | -4.96274 | 1.14149  | 3.32293  |
| C | 7.44757  | -0.02484 | 0.31486  |
| C | 3.33026  | -2.96735 | 0.20799  |
| C | 6.45322  | -3.10524 | 0.47723  |
| C | 6.50435  | -3.61169 | 1.93236  |
| C | 1.42235  | -5.55191 | 0.20727  |
| C | -3.35276 | -2.44851 | -1.31398 |
| O | -3.12762 | -1.91505 | -2.38169 |
| O | -2.22619 | -4.9674  | -0.06984 |
| O | -4.48572 | -3.12411 | -1.04035 |
| C | -5.40062 | -3.26799 | -2.13753 |
| O | -6.71302 | 2.08146  | 2.36191  |
| C | -7.46046 | 2.4596   | 1.18884  |
| C | -8.16797 | 1.28766  | 0.56966  |
| H | -0.26726 | 4.09883  | -0.71363 |
| H | 5.80396  | 2.14896  | 0.03682  |
| H | -3.32085 | 0.34316  | -1.07225 |
| H | 3.81522  | -3.93476 | 0.2892   |
| H | -2.54119 | 2.96515  | -0.15885 |
| H | 5.80785  | 4.26815  | 0.35102  |
| H | -3.03313 | -2.43531 | 0.78788  |
| H | -2.0242  | 1.65653  | -2.89172 |
| H | -3.49163 | 2.53293  | -2.42149 |
| H | -1.94761 | 3.39791  | -2.5626  |
| H | -5.7391  | -2.28891 | -2.48858 |

|   |          |          |          |
|---|----------|----------|----------|
| H | -6.23721 | -3.84646 | -1.74498 |
| H | -4.92389 | -3.79751 | -2.96639 |
| H | 0.89232  | 5.86429  | -0.16025 |
| H | 1.94261  | 6.15494  | -1.54988 |
| H | 2.53589  | 6.46987  | 0.08145  |
| H | -3.51793 | -0.20359 | 1.4316   |
| H | -2.77454 | 1.33817  | 1.78242  |
| H | -5.40304 | 0.93834  | 0.23322  |
| H | -4.67772 | 2.50103  | 0.5576   |
| H | 1.96684  | -5.765   | 1.13737  |
| H | 0.53343  | -6.18717 | 0.1796   |
| H | 2.08039  | -5.84797 | -0.6211  |
| H | -6.82997 | 2.97817  | 0.45859  |
| H | -8.18784 | 3.18249  | 1.5738   |
| H | 7.60782  | 0.58411  | 1.21467  |
| H | 8.18605  | -0.83154 | 0.32994  |
| H | 7.67359  | 0.61487  | -0.5479  |
| H | 7.47534  | -2.91621 | 0.12836  |
| H | 6.06073  | -3.90229 | -0.16802 |
| H | 7.10244  | -4.52733 | 2.00527  |
| H | 6.95014  | -2.85889 | 2.59153  |
| H | 5.49975  | -3.82908 | 2.31088  |
| H | 6.14751  | 6.47863  | -0.50329 |
| H | 4.44365  | 6.53568  | -1.21078 |
| C | -8.18592 | 1.02592  | -0.73763 |
| H | -8.71178 | 0.65373  | 1.26893  |
| H | -7.65238 | 1.64677  | -1.45513 |

|   |          |         |         |
|---|----------|---------|---------|
| H | -8.74684 | 0.18942 | -1.1447 |
|---|----------|---------|---------|

---

Table S17: Cartesian coordinates of ground state chlorophyll f (B3LYP functional with 6-31G (d) basis set)

|    |          |          |          |
|----|----------|----------|----------|
| C  | -1.65734 | -3.97826 | 0.0111   |
| C  | -0.23757 | -3.64266 | 0.06188  |
| C  | -0.09715 | -2.228   | -0.01491 |
| C  | -1.31564 | -1.52567 | -0.10845 |
| C  | -2.42463 | -2.57547 | -0.06353 |
| C  | 1.03762  | -4.17964 | 0.1532   |
| C  | 1.92713  | -3.02718 | 0.12722  |
| N  | 1.18481  | -1.85289 | 0.02331  |
| C  | -1.41179 | -0.1487  | -0.22831 |
| N  | -0.30501 | 0.65907  | -0.28446 |
| C  | -0.67458 | 1.95066  | -0.51282 |
| C  | -2.17758 | 2.05946  | -0.7477  |
| C  | -2.69589 | 0.66438  | -0.30803 |
| C  | 0.16305  | 3.0527   | -0.5722  |
| C  | 1.56859  | 3.09634  | -0.43081 |
| C  | 2.38446  | 4.29507  | -0.46505 |
| C  | 3.70795  | 3.89472  | -0.26724 |
| C  | 3.68071  | 2.45123  | -0.15675 |
| N  | 2.37011  | 2.0141   | -0.24134 |
| C  | 4.88036  | 4.76665  | -0.19752 |
| C  | 5.91623  | 4.62757  | 0.64332  |
| C  | 1.93156  | 5.6722   | -0.62125 |
| Mg | 1.7536   | 0.07794  | -0.11101 |
| N  | 3.71317  | -0.58865 | 0.05052  |
| C  | 4.82521  | 0.21186  | 0.02903  |
| C  | 6.02485  | -0.59839 | 0.12155  |
| C  | 5.60812  | -1.9087  | 0.20096  |
| C  | 4.15559  | -1.88484 | 0.15179  |
| C  | 4.79577  | 1.61259  | -0.06562 |
| C  | -2.49624 | 2.39026  | -2.21691 |
| C  | -3.44376 | 0.68241  | 1.04454  |
| C  | -4.81328 | 1.3627   | 0.95378  |
| C  | -5.53915 | 1.35395  | 2.29266  |
| O  | -5.07042 | 0.87891  | 3.29878  |
| C  | 7.4267   | -0.0647  | 0.13384  |
| C  | 3.32014  | -3.01877 | 0.18643  |
| C  | 6.45508  | -3.14238 | 0.3512   |

|   |          |          |          |
|---|----------|----------|----------|
| C | 6.60255  | -3.60923 | 1.81257  |
| C | 1.42979  | -5.62024 | 0.25397  |
| C | -3.36249 | -2.5746  | -1.25937 |
| O | -3.12912 | -2.07787 | -2.34197 |
| O | -2.21117 | -5.0585  | 0.0228   |
| O | -4.50155 | -3.22887 | -0.96368 |
| C | -5.42289 | -3.39165 | -2.05391 |
| O | -6.77026 | 1.93579  | 2.36989  |
| C | -7.48066 | 2.41759  | 1.21194  |
| C | -8.21647 | 1.31515  | 0.5044   |
| H | -0.30339 | 4.01499  | -0.74949 |
| H | 5.75921  | 2.10926  | -0.08908 |
| H | -3.35289 | 0.2351   | -1.07389 |
| H | 3.8132   | -3.98319 | 0.26369  |
| H | -2.59021 | 2.8543   | -0.11434 |
| H | 4.88213  | 5.62028  | -0.87404 |
| H | -3.03984 | -2.52283 | 0.843    |
| H | -2.11046 | 1.61084  | -2.88362 |
| H | -3.57987 | 2.45855  | -2.36989 |
| H | -2.04825 | 3.34461  | -2.51203 |
| H | -5.74834 | -2.41815 | -2.4312  |
| H | -6.26587 | -3.9466  | -1.64187 |
| H | -4.95605 | -3.95135 | -2.86839 |
| H | 2.73879  | 6.43268  | -0.56235 |
| H | -3.58587 | -0.33888 | 1.41126  |
| H | -2.83117 | 1.18783  | 1.80001  |
| H | -5.44217 | 0.86618  | 0.20339  |
| H | -4.70953 | 2.40352  | 0.61771  |
| H | 1.99029  | -5.82119 | 1.17592  |
| H | 0.54065  | -6.25547 | 0.24936  |
| H | 2.0705   | -5.92197 | -0.58445 |
| H | -6.81837 | 2.95932  | 0.52842  |
| H | -8.18949 | 3.13967  | 1.63137  |
| H | 7.63158  | 0.51925  | 1.04098  |
| H | 8.16318  | -0.87251 | 0.09456  |
| H | 7.61638  | 0.59494  | -0.72196 |
| H | 7.45171  | -2.95499 | -0.06598 |
| H | 6.03252  | -3.95952 | -0.24762 |
| H | 7.21979  | -4.51301 | 1.87294  |
| H | 7.0737   | -2.83268 | 2.42493  |
| H | 5.62627  | -3.83264 | 2.25656  |
| H | 6.74417  | 5.3303   | 0.62859  |
| H | 5.95691  | 3.83799  | 1.38761  |



|   |          |         |          |
|---|----------|---------|----------|
| C | -8.21429 | 1.13856 | -0.81723 |
| H | -8.79882 | 0.65895 | 1.15008  |
| H | -7.64235 | 1.78375 | -1.4817  |
| H | -8.79634 | 0.35207 | -1.28926 |
| O | 0.77667  | 6.03453 | -0.80457 |

---

Table S18. Cartesian coordinates of excited state chlorophyll f (B3LYP functional with 6-31G (d) basis set)

|   |          |          |          |
|---|----------|----------|----------|
| C | -1.64616 | -3.99406 | 0.00038  |
| C | -0.23209 | -3.65349 | 0.05482  |
| C | -0.09292 | -2.23767 | -0.00989 |
| C | -1.31957 | -1.53577 | -0.10075 |
| C | -2.42028 | -2.5914  | -0.05948 |
| C | 1.04938  | -4.18661 | 0.14467  |
| C | 1.93421  | -3.03019 | 0.12866  |
| N | 1.18934  | -1.85573 | 0.03384  |
| C | -1.41476 | -0.16277 | -0.21665 |
| N | -0.29392 | 0.65157  | -0.26899 |
| C | -0.67213 | 1.93417  | -0.50874 |
| C | -2.16954 | 2.04318  | -0.74806 |
| C | -2.69156 | 0.65355  | -0.30167 |
| C | 0.16127  | 3.05517  | -0.57112 |
| C | 1.55928  | 3.11355  | -0.4275  |
| C | 2.36253  | 4.31564  | -0.45889 |
| C | 3.6944   | 3.92094  | -0.24886 |
| C | 3.67159  | 2.4691   | -0.14057 |
| N | 2.37393  | 2.02373  | -0.23195 |
| C | 4.84533  | 4.80506  | -0.17961 |
| C | 5.97333  | 4.62686  | 0.5337   |

|    |          |          |          |
|----|----------|----------|----------|
| C  | 1.88074  | 5.67765  | -0.61651 |
| Mg | 1.75787  | 0.07872  | -0.09553 |
| N  | 3.71172  | -0.58185 | 0.06226  |
| C  | 4.82236  | 0.22673  | 0.04016  |
| C  | 6.0312   | -0.5891  | 0.12795  |
| C  | 5.61987  | -1.89601 | 0.20415  |
| C  | 4.16026  | -1.87775 | 0.15834  |
| C  | 4.79741  | 1.62132  | -0.04733 |
| C  | -2.48494 | 2.36771  | -2.22194 |
| C  | -3.44405 | 0.68334  | 1.05033  |
| C  | -4.81084 | 1.36798  | 0.95073  |
| C  | -5.53995 | 1.3672   | 2.28822  |
| O  | -5.07261 | 0.89726  | 3.29738  |
| C  | 7.42678  | -0.04481 | 0.13759  |
| C  | 3.33346  | -3.01892 | 0.18817  |
| C  | 6.46421  | -3.13124 | 0.34778  |
| C  | 6.57994  | -3.62669 | 1.80283  |
| C  | 1.45187  | -5.62343 | 0.23648  |
| C  | -3.36781 | -2.58251 | -1.24646 |
| O  | -3.15366 | -2.0597  | -2.32137 |
| O  | -2.19896 | -5.07738 | 0.00255  |
| O  | -4.49248 | -3.26193 | -0.95417 |
| C  | -5.41925 | -3.42275 | -2.03995 |
| O  | -6.77019 | 1.95022  | 2.35954  |
| C  | -7.47836 | 2.4257   | 1.19729  |
| C  | -8.21068 | 1.31899  | 0.49288  |
| H  | -0.31516 | 4.01192  | -0.75124 |

|   |          |          |          |
|---|----------|----------|----------|
| H | 5.76079  | 2.11466  | -0.08    |
| H | -3.34874 | 0.2194   | -1.06453 |
| H | 3.83049  | -3.98116 | 0.25718  |
| H | -2.5787  | 2.84677  | -0.12281 |
| H | 4.75578  | 5.73129  | -0.74612 |
| H | -3.0274  | -2.54898 | 0.85321  |
| H | -2.10563 | 1.58009  | -2.88236 |
| H | -3.56814 | 2.44269  | -2.37256 |
| H | -2.03078 | 3.317    | -2.52286 |
| H | -5.76491 | -2.44911 | -2.39857 |
| H | -6.24901 | -3.99935 | -1.63084 |
| H | -4.94905 | -3.96068 | -2.86705 |
| H | 2.66511  | 6.45988  | -0.54628 |
| H | -3.59026 | -0.3357  | 1.42095  |
| H | -2.83124 | 1.19065  | 1.80421  |
| H | -5.43882 | 0.86985  | 0.20077  |
| H | -4.70286 | 2.40717  | 0.61076  |
| H | 2.01024  | -5.8289  | 1.1597   |
| H | 0.56778  | -6.26567 | 0.22252  |
| H | 2.10047  | -5.91561 | -0.60031 |
| H | -6.81485 | 2.96538  | 0.51327  |
| H | -8.18906 | 3.14869  | 1.6118   |
| H | 7.61886  | 0.55843  | 1.03506  |
| H | 8.17121  | -0.84576 | 0.1165   |
| H | 7.61234  | 0.6035   | -0.72819 |
| H | 7.46905  | -2.93545 | -0.04454 |
| H | 6.05295  | -3.93569 | -0.27596 |

|   |          |          |          |
|---|----------|----------|----------|
| H | 7.19077  | -4.53504 | 1.85719  |
| H | 7.0437   | -2.8646  | 2.43846  |
| H | 5.5942   | -3.85282 | 2.22366  |
| H | 6.7647   | 5.37001  | 0.51019  |
| H | 6.1262   | 3.77461  | 1.188    |
| C | -8.20478 | 1.13657  | -0.82796 |
| H | -8.79392 | 0.66497  | 1.13994  |
| H | -7.63229 | 1.7798   | -1.49387 |
| H | -8.7846  | 0.34728  | -1.29802 |
| O | 0.71545  | 6.01283  | -0.81342 |

In Tables S19 and S20 below, the atoms are numbered as in the Gaussian output files. To relate those numbers to the IUPAC numbering scheme of the chlorophyll structures: C1 and O42 are the carbon and oxygen of the 13<sup>1</sup>-keto group; C40 and O41 are the carbonyl carbon and oxygen of the 13<sup>3</sup>-ester group and O43 is the alkoxy oxygen of the 13<sup>3</sup>-ester group; C33 and O34 are the carbonyl carbon and oxygen of the 17<sup>3</sup>-ester group and O45 is the alkoxy oxygen of the 17<sup>3</sup>-ester group; C22 and O85 are the carbon and oxygen of the 2<sup>1</sup>-formyl group in chlorophyll f.

Table S19. Displacements of the atomic coordinates associated with carbonyl vibrational modes calculated for chlorophyll a in the ground and excited states using CAM-B3LYP method.

| Ground state chlorophyll a       |           |       |       | Excited state chlorophyll a |       |       |
|----------------------------------|-----------|-------|-------|-----------------------------|-------|-------|
| Frequency<br>(cm <sup>-1</sup> ) | 1857.9697 |       |       | 1857.41                     |       |       |
| Atom                             | X         | Y     | Z     | X                           | Y     | Z     |
| C33                              | 0.29      | -0.23 | 0.72  | 0.30                        | -0.22 | 0.72  |
| O34                              | -0.21     | 0.16  | -0.45 | -0.21                       | 0.15  | -0.45 |
| O45                              | 0.01      | 0.00  | -0.03 | 0.01                        | -0.00 | -0.03 |
| Frequency<br>(cm <sup>-1</sup> ) | 1833.1840 |       |       | 1828.18                     |       |       |
| Atom                             | X         | Y     | Z     | X                           | Y     | Z     |

|                                  |           |       |       |         |       |       |
|----------------------------------|-----------|-------|-------|---------|-------|-------|
| C1                               | 0.22      | 0.38  | 0.01  | 0.13    | 0.24  | 0.01  |
| C40                              | -0.12     | -0.17 | 0.62  | -0.14   | -0.21 | 0.68  |
| O41                              | 0.10      | 0.12  | -0.38 | 0.11    | 0.14  | -0.43 |
| O42                              | -0.13     | -0.24 | -0.01 | -0.08   | -0.15 | -0.00 |
| O43                              | 0.02      | 0.01  | -0.04 | 0.02    | 0.02  | -0.04 |
| <hr/>                            |           |       |       |         |       |       |
| Frequency<br>(cm <sup>-1</sup> ) | 1816.0523 |       |       | 1806.18 |       |       |
| <hr/>                            |           |       |       |         |       |       |
| Atom                             | X         | Y     | Z     | X       | Y     | Z     |
| C1                               | 0.37      | 0.55  | 0.02  | 0.42    | 0.64  | 0.02  |
| C40                              | 0.13      | 0.14  | -0.41 | 0.10    | 0.11  | -0.25 |
| O41                              | -0.07     | -0.08 | 0.26  | -0.05   | -0.06 | 0.16  |
| O42                              | -0.20     | -0.37 | -0.01 | -0.24   | -0.42 | -0.01 |
| O43                              | -0.03     | -0.02 | 0.02  | -0.02   | -0.02 | 0.02  |
| <hr/> <hr/>                      |           |       |       |         |       |       |

Table S20. Displacements of the atomic coordinates associated with carbonyl vibrational modes calculated for chlorophyll f in the ground and excited states using CAM-B3LYP method.

| Ground state chlorophyll f       |         |       |       | Excited state chlorophyll f |       |       |
|----------------------------------|---------|-------|-------|-----------------------------|-------|-------|
| Frequency<br>(cm <sup>-1</sup> ) | 1856.57 |       |       | 1856.55                     |       |       |
| <hr/>                            |         |       |       |                             |       |       |
| Atom                             | X       | Y     | Z     | X                           | Y     | Z     |
| C33                              | 0.28    | -0.27 | 0.71  | 0.28                        | -0.26 | 0.71  |
| O34                              | -0.20   | 0.18  | -0.45 | -0.20                       | 0.18  | -0.45 |
| O45                              | 0.01    | 0.00  | -0.03 | 0.01                        | 0.00  | -0.03 |
| <hr/>                            |         |       |       |                             |       |       |
| Frequency<br>(cm <sup>-1</sup> ) | 1837.32 |       |       | 1829.35                     |       |       |
| <hr/>                            |         |       |       |                             |       |       |
| Atom                             | X       | Y     | Z     | X                           | Y     | Z     |
| C1                               | 0.28    | 0.49  | 0.00  | 0.15                        | 0.28  | 0.00  |

|                                  |         |       |       |         |       |       |
|----------------------------------|---------|-------|-------|---------|-------|-------|
| C40                              | -0.10   | -0.12 | 0.54  | -0.13   | -0.19 | 0.67  |
| O41                              | 0.08    | 0.09  | -0.33 | 0.10    | 0.13  | -0.42 |
| O42                              | -0.17   | -0.32 | 0.00  | -0.09   | -0.18 | -0.00 |
| O43                              | 0.01    | 0.01  | 0.03  | 0.02    | 0.02  | -0.04 |
| <hr/>                            |         |       |       |         |       |       |
| Frequency<br>(cm <sup>-1</sup> ) | 1821.06 |       |       | 1810.09 |       |       |
| <hr/>                            |         |       |       |         |       |       |
| Atom                             | X       | Y     | Z     | X       | Y     | Z     |
| C1                               | -0.31   | -0.46 | -0.00 | 0.40    | 0.62  | 0.01  |
| C40                              | -0.16   | -0.15 | 0.52  | 0.11    | 0.12  | -0.30 |
| O41                              | 0.09    | 0.09  | -0.33 | -0.05   | -0.06 | 0.19  |
| O42                              | 0.17    | 0.31  | -0.00 | -0.22   | -0.41 | -0.00 |
| O43                              | 0.03    | 0.02  | -0.03 | -0.03   | -0.02 | 0.02  |
| <hr/>                            |         |       |       |         |       |       |
| Frequency<br>(cm <sup>-1</sup> ) | 1785.68 |       |       | 1769.05 |       |       |
| <hr/>                            |         |       |       |         |       |       |
| Atom                             | X       | Y     | Z     | X       | Y     | Z     |
| C22                              | 0.64    | -0.27 | 0.11  | 0.62    | -0.25 | 0.11  |
| O85                              | -0.42   | 0.14  | -0.07 | -0.41   | 0.13  | -0.07 |
| <hr/> <hr/>                      |         |       |       |         |       |       |
